1 **Single cell transcriptomics and developmental trajectories of murine**  
2 **cranial neural crest cell fate determination and cell cycle progression**

3 **Yu Ji<sup>1,2,3</sup>, Shuwen Zhang<sup>1,2</sup>, Kurt Reynolds<sup>1,2,3</sup>, Ran Gu<sup>1,2</sup>, Moira McMahon<sup>2</sup>, Mohammad**  
4 **Islam<sup>2</sup>, Yue Liu<sup>2</sup>, Taylor Imai<sup>2</sup>, Rebecca Donham<sup>2</sup>, Huan Zhao<sup>2</sup>, Ying Xu<sup>4</sup>, Diana Burkart-**  
5 **Waco<sup>5</sup>, Chengji J. Zhou<sup>1,2,3\*</sup>**

6 <sup>1</sup>Department of Biochemistry and Molecular Medicine, University of California at Davis, School  
7 of Medicine, Sacramento, California 95817, USA

8 <sup>2</sup>Institute for Pediatric Regenerative Medicine, Shriners Hospitals for Children and UC Davis  
9 School of Medicine, Sacramento, California 95817, USA

10 <sup>3</sup>Biochemistry, Molecular, Cellular, and Developmental Biology (BMCCDB) graduate program,  
11 University of California, Davis, California 95616, USA

12 <sup>4</sup>Cambridge-SU Genomic Resource Center, Medical College of Soochow University, Suzhou  
13 215006, China

14 <sup>5</sup>DNA Technologies and Expression Analysis Core, Genome Center, University of California,  
15 Davis, California 95616, USA

16 \*Corresponding author: [cizhou@ucdavis.edu](mailto:cizhou@ucdavis.edu)

## 17 **Abstract**

18 Cranial neural crest (NC) cells migrate long distances to populate the future craniofacial regions  
19 and give rise to various tissues, including facial cartilage, bones, connective tissues, and cranial  
20 nerves. However, the mechanism that drives the fate determination of cranial NC cells remains  
21 unclear. Using single-cell RNA sequencing combined genetic fate mapping, we reconstructed  
22 developmental trajectories of cranial NC cells, and traced their differentiation in mouse embryos.  
23 We identified four major cranial NC cell lineages at different status: pre-epithelial-mesenchymal  
24 transition, early migration, NC-derived mesenchymal cells, and neural lineage cells from  
25 embryonic days 9.5 to 12.5. During migration, the first cell fate determination separates cranial  
26 sensory ganglia, the second generates mesenchymal progenitors, and the third separates other  
27 neural lineage cells. We then focused on the early facial prominences that appear to be built by  
28 undifferentiated, fast-dividing NC cells that possess similar transcriptomic landscapes, which  
29 could be the drive for the facial developmental robustness. The post-migratory cranial NC cells  
30 exit the cell cycle around embryonic day 11.5 after facial shaping is completed and initiates  
31 further fate determination and differentiation processes. Our results demonstrate the  
32 transcriptomic landscapes during dynamic cell fate determination and cell cycle progression of  
33 cranial NC lineage cells and also suggest that the transcriptomic regulation of the balance  
34 between proliferation and differentiation of the post-migratory cranial NC cells can be a key for  
35 building up unique facial structures in vertebrates.

36

## 37 **Introduction**

38 The craniofacial complex is one of the most diversified anatomical parts among vertebrates.  
39 Many studies have been focused on external factors like feeding behaviors that drive the  
40 selection of species-specific patterns of the craniofacial complex (Langenbach and van Eijden,

41 2001). Mutations that alter the molecular and cellular mechanisms of facial developmental  
42 processes could potentially provide the variation for selection, yet these mechanisms are still  
43 not well understood. The craniofacial complex comprise a cover of epithelial tissues, which are  
44 important signaling centers for craniofacial patterning (Hu and Marcucio, 2009), and  
45 mesenchymal tissues that build the substance of the complex and unique facial structures.  
46 Unlike the trunk mesenchyme that is derived from mesoderm, the facial mesenchyme mainly  
47 arises from cranial neural crest (NC) cells during development and evolution (Chai and Maxson,  
48 2006, Dash and Trainor, 2020).

49 The NC cells are transiently existing multipotent stem cells and originated from the  
50 dorsal edge of the neural fold or neural tube during embryonic development (Ji et al., 2019,  
51 Crane and Trainor, 2006). After induction, the NC cells delaminate from the neuroectoderm and  
52 migrate long distances to generate numerous cell types (Shyamala et al., 2015). NC cells  
53 induced from the mid-diencephalon and hindbrain regions are named cranial or cephalic NC  
54 cells (Lumb et al., 2017). They migrate into the frontonasal prominence (FNP) and the first  
55 pharyngeal arch (Lumsden et al., 1991) to give rise to the paired lateral nasal prominences, the  
56 medial nasal prominences, the maxillary prominences, and the mandibular prominences, and  
57 eventually generate cartilage, bone, connective tissue, and other derivatives at the anterior  
58 region of the craniofacial complex and upper/lower jaws (Cordero et al., 2011, Chai and  
59 Maxson, 2006, La Noce et al., 2014).

60 When cranial NC cells arrive at the facial regions, the craniofacial complex is still very  
61 small. As the embryo develops, the NC cells undergo rapid proliferation to confer the correct  
62 shape and size of the craniofacial complex. Little is known about how the cranial NC cells  
63 generate different structures of the face. Some evidence shows that the fate of pre-migratory  
64 trunk NC cells can be predicted by the time they delaminate from the dorsal neural tube, as well  
65 as their ventral-dorsal position within the neural tube, suggesting there is an intrinsically

66 programmed pre-patterning that regulates the early fate restrictions of NC cells (Nitzan et al.,  
67 2013, Krispin et al., 2010). However, unlike the trunk NC cells, which undergo EMT individually,  
68 the cranial NC cells delaminate from the neural tube and migrate as a coherent sheet of cells (Ji  
69 et al., 2019, Alfandari et al., 2010). Therefore, it is not known if defined NC-derived parts within  
70 the craniofacial complex arise from pre-determined regions of the dorsal neural tube. On the  
71 other hand, NC cells always interact with the mesoderm and ectoderm in the first pharyngeal  
72 arch to generate a fully functioning jaw (Baker and Bronner-Fraser, 2001). Signals, such as  
73 Shh, Wnt, Fgf and Bmp, from the epithelial signaling centers could guide the outgrowth of the  
74 frontonasal structures (Jheon and Schneider, 2009, Foppiano et al., 2007, Kasberg et al., 2013,  
75 Szabo-Rogers et al., 2008, Creuzet et al., 2004), indicating that the environment within the FNP  
76 may be critical for establishing the fate restrictions of NC cells. Therefore, whether the intrinsic  
77 or extrinsic cues that regulate cranial NC cells to commit to a restricted cell fate still needs  
78 further investigations.

79 In this study, we combined single-cell RNA sequencing (scRNA-seq) and lineage tracing  
80 to investigate the cell fate decisions involved in cranial NC lineage cells. We identified four  
81 major cranial NC cell lineages at different status and found that the cell fate determination that  
82 separates neural and mesenchymal cell lineages happens twice. We then focused on the NC-  
83 derived early mesenchymal cells right before the formation of the bones, cartilage, and other  
84 tissues in the face. We demonstrate that the differentiation of NC-derived mesenchymal cells  
85 initiates at a relatively late developmental stage, after the outgrowth of the craniofacial complex.  
86 Our results indicate that the initiation of the differentiation of NC-derived mesenchymal cells is  
87 coupled to cell cycle exit, indicating that instead of pre-patterned before migration, cell cycle  
88 regulation may play a more critical role in cranial NC cell fate determination and differentiation.

89

## 90 **Results**

## 91 **A single-cell graph of NC developmental process in the murine embryos**

92 We combined lineage tracing and scRNA-seq to address the spatiotemporal dynamics and  
93 investigate the cell fate decisions involved in NC cell differentiation after they migrate to their  
94 target regions (Fig. 1A). To genetically label NC cells and their progenies, we crossed Wnt1-Cre  
95 mice with the Rosa26-tdTomato/eGFP (Rosa26-mT/mG) reporter mouse line. The Wnt1-Cre-  
96 mediated recombination has been shown to occur in cranial and cardiac neural crest cells,  
97 midbrain, and developing neural tube (Tavares and Clouthier, 2015). Therefore, it can label  
98 these tissues and their progeny cells with green fluorescence. Since the cranial NC cells migrate  
99 to their target region around E8.5 and the generation of the facial prominences is completed by  
100 E12.5 (Ji et al., 2020), we collected eGFP positive cells from E9.5, E10.5, E11.5, and E12.5  
101 embryos using fluorescence-activated cell sorting (Fig. 1B, C). Therefore, our data covered  
102 most of the circuital stages for forming, fusion, and merging craniofacial prominences (Ji et al.,  
103 2019). Then we performed 10X single-cell RNA sequencing using live eGFP positive cells. The  
104 sequencing detected roughly 3,382, 3,380, 3,012, and 2,465 genes per cell from E9.5, E10.5,  
105 E11.5, and E12.5 embryos, respectively (Fig. S1).

106 In addition to the dorsal spinal cord, where the premigratory NC cells are located, the  
107 Wnt1-Cre is also expressed at the midlines of the midbrain, the caudal diencephalon, and the  
108 midbrain-hindbrain junction after the closure of the dorsal neural tube (Debbache et al., 2018).  
109 However, cells from the central nervous system can be distinguished from the NC-derived cells  
110 based on gene expression. We sorted out the non-NC cells based on their marker genes *in*  
111 *silico*. For example, the neural tube population expresses neural plate border specifier genes  
112 such as *Zic1*, *Zic3*, and *Pax3* (Soldatov et al., 2019), while cells from the developing midbrain,  
113 hindbrain, and cerebellum express *Wnt7b*, *Wnt8b*, *Hes5*, *Lhx1*, and *Lhx5* (Garda et al., 2002,  
114 Zhao et al., 2007). Moreover, epithelial cells (specifically expressing *Epcam*, *Krt8*, *Krt14*),  
115 endothelial cells (specifically expressing *Cdh5*), and red blood cells (specifically expressing

116 *Hbb-y*, *Hba-x*, *Hba-a2*), which are small clusters containing only eGFP negative cells, were also  
117 removed from further analysis.

118 After removing the non-NC cells from our dataset, a total of 19,640 single-cell  
119 transcriptomes passed quality control for further analysis, including 3,620, 4,284, 4,302, and  
120 7,434 cells from E9.5, E10.5, E11.5, and E12.5 embryos, respectively. Using Uniform Manifold  
121 Approximation and Projection (UMAP), we analyzed the transcriptional heterogeneity of NC-  
122 derived cells. When the data from all four time points were analyzed together, we found that the  
123 NC cells clustered into four major cell populations.

124

### 125 **Identification of the major NC-derived cell types**

126 We identified the major NC-derived cell types based on the expression of known marker genes.  
127 The major NC-derived cell populations were identified as pre-EMT, which express *Wnt1* and  
128 *Wnt3a* (Ikeya et al., 1997), early migration, which express *Sox10* and *Foxd3* (Kirby and Hutson,  
129 2010), NC-derived mesenchymal cells, which express *Twist1* and *Prrx2* (Soldatov et al., 2019),  
130 and the neural lineage cells, which express *Tubb3* and *Elavl3* (Soldatov et al., 2019, Delile et al.,  
131 2019) (Fig. 2A, B, and Fig. S2, Table S1). Notably, a small cluster representing the cardiac  
132 neural crest cells that migrate to the outflow tract were identified based on their expression of  
133 *Tbx20* and *Acta2* (Singh et al., 2005). These results argue that our data captured a majority of  
134 known NC-derived cell types.

135 Previous studies showed that both pre-EMT and early migratory NC cells maintained  
136 multipotency in mice (Baggiolini et al., 2015). One important characteristic of multipotent stem  
137 cells is their ability to self-renew. Therefore, we analyzed the cell cycle states across the major  
138 cell populations using the Seurat scRNA-seq analysis pipeline (Fig. 2C, Fig. S3). Indeed, 64.2%  
139 of the pre-EMT and 86.7% of the early migratory neural crest cells are in the S or G2/M phase

140 of the cell cycle, suggesting they are fast-dividing cells consistent with the hypothesis that they  
141 are multipotent progenitor cells. In contrast, only 9.3% of neural lineage cells are at the S or  
142 G2/M phase, indicating that the neural lineage is no longer actively dividing. Interestingly, our  
143 results showed that 80.5% of the mesenchymal cells are at the S or G2/M phase, indicating that  
144 most mesenchymal cells are also proliferating, the frequency of which was dynamic across the  
145 sampled time points (Fig. 2D). The frequency of pre-EMT and early migratory NC cells declined  
146 over time, while mesenchymal and neural lineage cells increased dramatically after E11.5.  
147 These results suggest that our data represent the developmental process that NC progenitor  
148 cells lose multipotency and differentiate into various fates.

149

#### 150 **Reconstruction of developmental trajectories of NC cells**

151 One of the benefits of scRNA-seq is that it allows mapping dynamic differentiation process by  
152 densely sampling cells at different stages, in our case E9.5, E10.5, E11.5, and E12.5.  
153 Therefore, these NC-derived cells sampled at different time points can be used to create a  
154 continually NC developmental trajectory. To reconstruct the progression that cells undergo  
155 during their differentiation from pre-EMT NC progenitor cells to fate determined neural or  
156 mesenchymal cells, we performed pseudotime analysis on all of the eGFP positive cells (Fig.  
157 3A, B). The resulting lineage tree demonstrates the transcriptional changes associated with cell  
158 fate splits. After emigrating from the dorsal neural tube, the fate determination that separate  
159 neural and mesenchymal cell lineages happen twice (Fig. 3C). The first differentiation separates  
160 cranial sensory ganglia (expressing *Tlx2*, *Tlx3*, and *Neurog1*) (Logan et al., 1998) from  
161 progenitors of mesenchymal and the other neural lineage, such as Schwann cell precursors  
162 (expressing *Pou3f1* and *Pu3f2*). The second fate determination generates the mesenchymal  
163 branch (Fig. 3D). Soldatov *et al.* also found that NC cell fate determination occurred through a  
164 progression of binary decisions, similar to our results (Soldatov et al., 2019).

165

## 166 **Characterization of the mesenchymal cells at facial prominences**

167 Once committed to a mesenchymal fate, cranial NC cells generate most of the bone and  
168 cartilage in the craniofacial regions. However, it remains unclear how post-migratory NC-derived  
169 mesenchymal cells are induced to differentiate into the specific craniofacial skeletal structures  
170 with the correct size and shape. To reveal the mechanisms that drive the fate determination of  
171 craniofacial mesenchymal cells, we re-clustered the 9,875 NC-derived mesenchymal cells  
172 collected from E9.5, E10.5, E11.5, and E12.5 embryos (Fig. 4A, B, Table S2). Using cluster-  
173 specific marker genes and wholemount *in situ* hybridization (WISH), we identified fifteen clusters  
174 associated with NC cells that migrate into the frontonasal prominences and the maxillary  
175 prominence of the first pharyngeal arch (Fig. 4C-E). For example, the aristaless-like homeobox  
176 *Alx* genes, *Alx1*, *Alx3*, and *Alx4*, are widely expressed in the midfacial complex at E10.5, and  
177 cells that highly express these genes are enriched in cluster m1 (mesenchymal 1), suggesting  
178 these clusters are from the midfacial prominences. By E11.5, *Alx1* and *Alx4* continue to be  
179 widely expressed in all three paired midfacial primordia, the lateral nasal prominence (LNP), the  
180 medial nasal prominence (MNP), and the maxillary prominence (MxP), suggesting that clusters  
181 m1, 3, 7, and 11 represent the mesenchymal cells at midfacial prominences. The expression of  
182 *Alx3* is limited to MNP, indicating that clusters m3 and 11 are the MNP. In contrast, *Barx1* is  
183 widely expressed in the mandibular prominence of the first pharyngeal arch, the second, third,  
184 fourth, and sixth pharyngeal arches at E10.5, suggesting clusters m2, 4, 5, 6, 8, 9, 10 are from  
185 the pharyngeal regions. At E11.5, a small part of ventral MxP also begins to express *Barx1*, and  
186 those cells are found in cluster m3. Together, using cluster-specific markers, we identified m1,  
187 3, 7, and 11 as the mesenchymal cell populations of the midfacial prominences. Interestingly,  
188 cells from early developmental stages (E9.5 and E10.5) are enriched in cluster m1, while cells  
189 from late developmental stages (E11.5 and E12.5) are scattered in all four clusters, suggesting



190 that the transcriptional heterogeneity for cells from E11.5 and E12.5 is more complicated  
191 compared to E9.5 and E10.5 (Fig. 4B).

192

193 **The differentiation of NC-derived craniofacial mesenchymal cells starts at a relatively late**  
194 **developmental stage**

195 We next performed a pseudotime analysis of cells from clusters m1, 3, 7, and 11 using Monocle  
196 2 to reconstruct the development processes (Trapnell et al., 2014). Monocle 2 performed an  
197 unsupervised analysis to order the cells and reconstructed a tree-like trajectory, beginning with  
198 E9.5 and E10.5 cells and ending with E11.5 and E12.5 cells (Fig. 5A, B). Notably, cells in the  
199 "root" branch are mostly from E9.5 and E10.5 embryos. By contrast, cells from E11.5 and E12.5  
200 embryos are spread out in the other four states, indicating that the differentiation of craniofacial  
201 mesenchymal cells is likely to initiate at a later developmental stage (Fig. 5C).

202 The transcriptional complexity of NC lineage cells decreases with developmental  
203 progression (Jean-Baptiste et al., 2019, Saunders et al., 2019, Gulati et al., 2020). Dorrity et al.  
204 developed a mathematical model to calculate the developmental progression of a single cell  
205 based on the number of genes that were detected per cell (Dorrity, 2020). To test whether the  
206 differentiation of craniofacial mesenchymal cells starts after E11.5, we measured the  
207 developmental progression of craniofacial mesenchymal cells (Fig. 5F, G). The result shows  
208 that the transcriptional complexity decreases in E11.5 and E12.5 embryos, leading to a higher  
209 developmental progression score, while E9.5 and E10.5 embryos remain at early developmental  
210 stages (Fig. 5F, G). In addition, we identified that more than 10,000 genes that exhibit temporal  
211 expression patterns, which fall into two distinct gene groups (Fig. 5D, Table S3). One group of  
212 genes are highly expressed in the early development stages (E9.5 and E10.5). The other group  
213 of genes is highly expressed at the late development stages (E11.5 and E12.5) and includes

214 genes like *Msx1* and *Col1a1* that are critical for craniofacial development (Fig. 5E), suggesting  
215 the ossification of craniofacial mesenchymal cells initiates at E11.5.

216 To test whether the ossification of NC-derived craniofacial mesenchymal cells starts at  
217 E11.5, we examined the expression of genes regulating bone formation in cells at different time  
218 points along the developmental trajectory. The ossification of undifferentiated mesenchymal  
219 cells into bone cells begins with the formation of osteoprogenitors. This step is regulated by  
220 master transcription factors such as *Sox9*, *Runx2*, and *Msx1* (Javed et al., 2010). The  
221 expression of these genes increased after E11.5 along the trajectory (Fig. 5E). During the next  
222 stage of osteoblast development, the cells start to express genes like collagen and fibronectin  
223 genes (Rutkovskiy et al., 2016), which are known to be critical for the arrest of cell motility  
224 during the osteoblast-to-osteocyte transition (Shiflett et al., 2019). In our data, the expression of  
225 *Col1a1*, *Col2a1*, and *Col3a1* is increased after the first branch point along the trajectory (Fig.  
226 5E), suggesting the ossification of craniofacial mesenchymal cells initiates after E11.5.  
227 Therefore, although NC-derived mesenchymal cells populate at the craniofacial complex and  
228 give rise to different prominences as early as E9.5, they remain at an undifferentiated,  
229 homogeny stage. The differentiation of NC-derived mesenchymal cells into different bones in  
230 the facial region does not initiate until E11.5, suggesting the fate of cranial NC cells might not be  
231 intrinsically programmed but is acquired from the environment.

232

### 233 **The initiation of the ossification is coupled to cell cycle progression**

234 To reveal the mechanism that triggers the differentiation of cranial NC-derived mesenchymal  
235 cells, we performed branch-dependent expression analysis at the first branch point (Fig. 6A,  
236 Table S4). The results showed that one group (Group 1 in Fig. 6A) of genes is highly expressed  
237 in the root branch, and the expression of these genes significantly decreased in both branches,

238 especially in cells at fate 1. Gene ontology (GO) enrichment analysis suggests that these genes  
239 are involved in cell cycle regulation, chromosome segregation, and microtubule cytoskeleton  
240 organization. In addition, many genes that inhibit the differentiation process are also  
241 downregulated in both branches (Fig. 6B). For example, the inhibitor of DNA binding and cell  
242 differentiation protein (*Id1*) has been shown to be expressed in embryonic and somatic stem  
243 cells and sustains the stemness of these cells through inhibition of differentiation (Jankovic et  
244 al., 2007, Nakashima et al., 2001, Nam and Benezra, 2009, Ying et al., 2003). *Id1* expression  
245 was downregulated in both cell fates. *Stub1*, encoding an E3 ligase that negatively regulates  
246 ossification by inducing the degradation of Runx2, is also down-regulated in both branches (Li et  
247 al., 2008). These results suggest that at E11.5, the NC-derived craniofacial mesenchymal cells  
248 adopt a ready-to-differentiate state.

249 Another group of genes (Group 3 in Fig. 6A) has been shown to be highly expressed in  
250 cells at one branch (fate 1 in Fig. 5A and Fig. 6A). Functional analysis of genes in this group  
251 suggests that they are involved in skeletal development, extracellular matrix organization, and  
252 ossification (Fig. 6A). For example, bone-specific genes, such as collagens, *Sox9*, and *Msx1*,  
253 are specifically up-regulated in fate 1. On the other hand, cell cycle genes, including *Top2a*,  
254 *Cdk1*, *Cdc20*, and *Rrs1*, are upregulated in fate 2 (Fig. 6B). Moreover, 98.5% and 95% of cells  
255 from E9.5 and E10.5 embryos are dividing cells, while only 62.5% and 62.7% of cells from  
256 E11.5 and E12.5 embryos are dividing cells (Fig. 6C, D), indicating that a group of cells has  
257 exited the cell cycle by E11.5. Given that the first branch point of the trajectory separates cells  
258 before or after E11.5, our results indicate that this branch point might be a decision-making  
259 point for a population of cells to exit the cell cycle and start to differentiate.

260 To address the reproducibility of our analysis, we isolated post-migratory NC cells  
261 labeled by Sox10-Cre;Rosa26-mT/mG reporter from E11.5 embryos, and performed scRNA-seq  
262 analysis (Hari et al., 2012). Indeed, the facial mesenchymal cells from the Sox10-Cre dataset

263 generated the same four clusters with a similar percentage of cells in each cluster as the Wnt1-  
264 Cre dataset. Moreover, the expression level of all genes, the patterns of marker genes were  
265 also similar between Wnt1-Cre and Sox10-Cre datasets (Fig. 7). Therefore, our analysis  
266 revealed highly reproducible NC-derived cell populations associated with facial prominences,  
267 which allows us to combine Wnt1-Cre and Sox10-Cre datasets for further analysis.

268         The facial mesenchymal cells from E11.5 embryos were populated into four clusters.  
269 Based on marker genes and published literature (Li et al., 2019), we found that m0, m1, and m2  
270 contain cells from MNP and LNP (expressing *Alx1*, *Alx3*, *Alx4*, and *Pax7*), and m3 contains cells  
271 from MxP (expressing *Barx1* and *Asb4*) (Figs. 7F, 8A, B, Table S5). Cell cycle analysis  
272 indicated that 83.2% of cells in m2 and 67.7% in m3 are actively dividing cells while only 46.1%  
273 m0 and 44.9% m1 cells are undergoing mitosis (Fig. 8C, D). Further analysis revealed that cells  
274 in m0 and m1 exhibit more transcriptional complexity than cells in m2 and m3, indicating that m2  
275 and m3 might be at an earlier developmental stage than m0 and m1 (Fig. 8E). During mouse  
276 facial development, the morphogenesis of the LNP- and MNP-derived structures progresses  
277 from E10.5 to E12.5. However, MxP cells continue to grow until E15.5 to give rise to the  
278 secondary palate (Ji et al., 2020). This is consistent with our results that, at E11.5, LNP and  
279 MNP cells (m0, m1, and m2) were grouped into three clusters at different differential stages  
280 while most of the MxP cells (m3) are still at an early developmental stage.

281         To further reveal the possible mechanisms that drive the differentiation of LNP and MNP  
282 cells, we analyzed the differentially expressed gene expression between m2 and m0 (Table S6)  
283 and m2 and m1 (Table S7). As a result, both *Twist1* and *Id2*, known to be required for cell  
284 proliferation during the early osteoblast differentiation stage (Javed et al., 2010, Sakata-Goto et  
285 al., 2012), were expressed at a higher level in m2. In contrast, many genes involved in cartilage  
286 formation, such as *Sox9*, *Col2a1*, *Itih2a*, *Igfbp5*, and *Col9a1*, are expressed at a higher level in  
287 m0 than in m2, suggesting cells in m0 are chondroprogenitors (Fig. 8F). Although cells in m1 do

288 not have many highly expressed genes compared to m2, *Igfbp5* and *Itm2a* were found to also  
289 highly express in m1. *Igfbp5* has been shown to stimulate bone cell growth (Miyakoshi et al.,  
290 2001). Studies in mice also showed that *Itm2a* was involved in osteogenic differentiation  
291 (Tuckermann et al., 2000). These results indicate that m1 might represent a transition stage  
292 between mesenchymal stem cells and chondroprogenitors. Moreover, we also found that  
293 *Wnt5a*, *Lef1*, and *Crabp1* were highly expressed in m2. In contrast, a WNT antagonist gene  
294 *Dkk2* was highly expressed in m0, suggesting Wnt and retinoic acid signaling might be essential  
295 for maintaining the self-renewal of mesenchymal stem cells.

296

## 297 **Discussion**

298 The facial region is mainly comprised of NC-derived cells. However, how cranial NC cells  
299 develop into the facial structures is still not entirely clear. We addressed this question by tracing  
300 the lineage of NC cells in mouse embryos. Using the single-cell transcriptomic data, we  
301 described a spatiotemporal molecular specification tree of post-migratory cranial NC cells,  
302 showing the fate determination process of NC-derived mesenchymal cells at the facial  
303 prominences. Our study indicates that the differentiation of NC-derived craniofacial  
304 mesenchymal cells initiates as late as E11.5, and the differentiation is coupled with the exit of  
305 the cell cycle.

306 In mice, the cranial NC cells migrate to the anterior of the embryos as early as E8.5 and  
307 build the frontonasal prominence (FNP) at E9.25. By E10.25, the FNP gives rise to the paired  
308 MNPs and LNPs. The MNPs continue to fuse with the MxP at E11.25, generating the upper jaw  
309 (Everson et al., 2018). Eventually, the cranial NC cells generate most of the bone and cartilage  
310 in the craniofacial region. However, how the fate of each NC cell is determined is unclear. One  
311 hypothesis was that NC cells contain an intrinsically programmed molecular facial patterning

312 "blueprint" when they delaminate from the neural tube. However, our single-cell transcriptome  
313 data shows that at E9.5 and E10.5, NC-derived mesenchymal cells in different facial  
314 prominences are similar to each other at the transcriptomic level, regardless of where they  
315 come from. At a later developmental stage, E11.5, the cells exhibit more transcriptional  
316 heterogeneity, suggesting that the fates of different cell populations are beginning to diverge.  
317 Reconstruction of a lineage trajectory of cranial NC lineage cells also indicates the  
318 differentiation of NC cells initiates at E11.5. Therefore, we propose that cranial NC cells  
319 maintain their differentiation potential until the morphology of the face is shaped. In support of  
320 our new hypothesis, Kaucka *et al.* showed that the shape of the face is mainly formed by local  
321 cellular divisions (Kaucka et al., 2016). The authors also found that the proliferation activity of  
322 NC cells resulted in cellular mixing in the facial tissue. They proposed that the fact that  
323 progenies of several NC cells locally mixed might guarantee the developmental robustness of  
324 facial complex. Our results support this hypothesis because we found that fast-dividing NC cells  
325 maintain their stemness. Therefore, hypothetically, mutations that happen in an NC cell can be  
326 counterbalanced by unaffected neighbor undifferentiated NC cells.

327       Terminal differentiation of many multipotent cells such as neural stem cells is associated  
328 with cell cycle exiting (Soufi and Dalton, 2016, Hardwick and Philpott, 2014). Our results  
329 showed that the NC-derived mesenchymal stem cell differentiation is also cell cycle-dependent.  
330 The molecular mechanisms that underline this phenomenon still need further study. One  
331 possible mechanism is the epigenetic landscape at the developmental genes that might change  
332 in the G1 phase. In pluripotent stem cells, most developmental genes are H3K4 and H3K27  
333 trimethylated near their transcription start sites to be silenced by a polycomb-dependent  
334 mechanism (Bernstein et al., 2006). However, transcriptional leakiness of developmental genes  
335 could happen at the G1 phase, making the G1 phase an opportunity for differentiation (Singh et  
336 al., 2013). Consistent with this hypothesis, ablation of the polycomb complex-associated

337 methyltransferase gene *Ezh2* in NC cells causes various facial deformities (Kim et al., 2018,  
338 Schwarz et al., 2014). Also, BMP signaling has been shown to be required for guiding the  
339 outgrowth of facial prominences (Graf et al., 2016). G1-specific cyclin-dependent protein  
340 kinases (CDKs) have been shown to target transcription factors like Smad2/3, leading to the  
341 expression of their target genes in the G1 phase (Kim et al., 2018, Pauklin and Vallier, 2013).  
342 Cell cycle regulation has been known to play an important role in many development processes  
343 of NC cells. For example, trunk NC cells delaminate from the dorsal neural tube only in the S  
344 phase (Burstyn-Cohen and Kalcheim, 2002). *In vivo* studies also revealed the dividing activity of  
345 cranial NC cells is increased as they migrated into the branchial arches (Ridenour et al., 2014).  
346 These cells continue dividing to form the facial complex with the correct shape and size (Kaucka  
347 et al., 2016). Our study shows that at a relatively late developmental stage (E11.5), after  
348 building the morphology of the craniofacial structures, the NC cells exit the cell cycle and start to  
349 differentiate. This may indicate that the variety of craniofacial shapes and functions in different  
350 species might be regulated by the rates of proliferation and the time exiting the cell cycle.

351         The fact that cranial NC-derived mesenchymal cells keep rapidly dividing until E11.5  
352 suggests some signals promoting fast NC cell proliferation. Comparing the gene expression of  
353 fast and slow dividing cells from MNPs and LNPs reveals that *Wnt5a* is highly expressed in the  
354 fast-dividing cells, which has been shown to orient the direction of cell division and outgrowth of  
355 facial structures (Kaucka et al., 2016). Our results show that NC-derived mesenchymal  
356 proliferation in the facial primordia is, at least partly, regulated by *Wnt5a*. This conclusion is  
357 supported by the fact that knocking out and overexpressing *Wnt5a* causes facial outgrowth  
358 deficiency (van Amerongen et al., 2012, Bakker et al., 2012, Ho et al., 2012), suggesting the  
359 gradient of *Wnt5a* needs to be precisely regulated within the facial primordia for developing a  
360 face with correct shape and size.

361 Our data highlight the similarity between cranial NC cells at early developmental stages  
362 at a single cell transcriptomic level, which could be the reason for the facial developmental  
363 robustness. Additionally, our data also reveal that NC cell differentiation is associated with the  
364 exiting of the cell cycle, and the regulation of cell proliferation might be a key step in the  
365 evolution of various craniofacial shapes and functions in vertebrates.

366

## 367 **Materials and methods**

### 368 **Mouse strains and genetic fate mapping**

369 All animal work was approved and permitted by the UC Davis Animal Care and Use Committee  
370 and conducted according to the NIH guidelines. NC cell-specific genetic tracing mouse lines,  
371 Wnt1-Cre and Sox10-Cre lines were previously described (Lewis et al., 2013, Chen et al., 2017,  
372 Hari et al., 2012). Both Wnt1-Cre and Sox10-Cre strains were crossed with the Rosa26-  
373 tdTomato/eGFP (Rosa26-mT/mG) reporter line to label NC cells with eGFP (Muzumdar et al.,  
374 2007). All the mouse strains were ordered from the Jackson Laboratory (stock numbers 022137,  
375 025807, and 007676). Pregnant, timed-mated mice were euthanized with overdosed isoflurane  
376 (SAS, PIR001325-EA) prior to cesarean section. The day of conception was designated  
377 embryonic day 0.5 (E0.5). For genetic fate mapping, Wnt1-Cre;Rosa26-mT/mG and Sox10-  
378 Cre;Rosa26-mT/mG embryos were sampled at E10.5. The wholemount imaging was performed  
379 with Nikon A1 confocal laser microscope. Basic image processing and analysis were performed  
380 using NIS-Elements C software.

381

### 382 **Wholemount *in situ* hybridization**



383 E10.5 and E11.5 mouse embryo cDNA libraries were used to clone fragments of the coding  
384 sequence of mouse *Alx1*, *Alx3*, *Alx4*, and *Barx1*. The following primers were used: *Alx1*: forward  
385 primer 5'-GCGAGAAGTTTGCCCTGA-3', reverse primer 5'-AAATGCGTGTCCGTTGGT-3',  
386 *Alx3*: forward primer 5'-CTGTCTCATGTCTCCAGAGGG-3', reverse primer 5'-  
387 TGTAGACTAGCACAGGGCAGAA-3', *Alx4*: forward primer 5'-CCATCCTGGATTGGCAAC-3',  
388 reverse primer 5'-GGGGGCCTGACTTTGACT-3', *Barx1*: forward primer 5'-  
389 AGACAATTAAGGGCCAGACAAG-3', reverse primer 5'-GTCCCCCACTGTGTCATAAAAT-3'.

390 The embryos were collected at E10.5 and E11.5 and fixed in 4% PFA overnight at 4 °C. As  
391 previously described, wholemount *in situ* hybridization was performed with digoxigenin-labeled  
392 antisense RNA probes (Volker et al., 2012). Briefly, embryos were digested with proteinase K  
393 (1:1000) for 6 min (for E10.5 embryos) or 20 min (for E11.5 embryos) and refixed in 4%  
394 PFA/0.25% glutaraldehyde for 20 min at room temperature. After 60 min of prehybridization at  
395 67 °C, the embryos were hybridized with probes overnight at 67 °C. Embryos were incubated  
396 with 1:4,000 diluted alkaline phosphatase-conjugated anti-digoxigenin antibody (Roche,  
397 11093274910) overnight at 4 °C. Alkaline phosphatase activity was detected using NBT/BCIP  
398 (Sigma, N6876 and 10760994001).

399

#### 400 **Single-cell RNA-sequencing analyses**

401 Mouse embryos with Rosa26-mT/mG reporter were collected at E9.5, E10.5, E11.5, and E12.5  
402 in ice-cold PBS and then dissociated using a cold-active protease (CAP) protocol (Adam et al.,  
403 2017). Briefly, embryos were incubated to 125 µl of cold protease solution [1.25 mg/ml *Bacillus*  
404 *Licheniformis* protease (Creative Enzymes, NATE0633) and 125 U/ml DNaseI (ThermoFisher,  
405 EN0521) in Dulbecco's phosphate-buffered saline (DPBS) with calcium and magnesium] in 4 °C

406 with trituration using a 1 ml pipet (10 s every 3 min). After 9, 12, 21, and 30 min incubation for  
407 E9.5, E10.5, E11.5, and E12.5 embryos, respectively, 1 ml ice-cold PBS with 15% fetal bovine  
408 serum (PBS/FBS) was added to the single-cell suspension. Cells were passed through a 35  $\mu$ M  
409 cell strainer (Falcon, 352235). Cells were pelleted by 1200 g centrifuge for 5 min at 4 °C and re-  
410 suspended in 1 ml PBS with 1% FBS. The PBS/FBS wash was repeated one more time.  
411 1000nM DAPI was added to the cell suspension to label dead cells. Fluorescent-activated cell  
412 sorting was performed to collect eGFP positive and DAPI negative cells. The cell concentration  
413 was adjusted to approximately 500 cells/  $\mu$ l for 10x Genomics' single-cell RNA-seq.

414 The Cell Ranger Single Cell software (<http://10xgenomics.com/>) was used to align reads  
415 and generate feature-barcode matrices. Cell clusters and marker genes were identified using  
416 Seurat\_ 3.2.0 (Butler et al., 2018, Stuart et al., 2019). Initial cell filtering selected cells that  
417 expressed >2000 reads and contained <10% mitochondrial genes. Normalization was  
418 performed by the "NormalizeData" function in Seurat. The "FindVariableFeatures" function was  
419 used to calculate a subset of highly variable features (10000 genes) for future analysis. We  
420 used the "CellCycleScoring" function in Seurat to score the cell cycle phase of every cell  
421 (Nestorowa et al., 2016). The cell that highly express G2/M- or S-phase markers were  
422 annotated as G2/M- or S-phase, respectively. Other cells were annotated as G1 phase cells.  
423 Clustering was performed with the "RunUMAP" function in Seurat using significant principal  
424 components determined by the JackStraw plot. For each cluster, Marker genes were  
425 determined with Seurat's "FindAllMarkers" function using genes detected in at least 25% of cells  
426 and a fold change threshold of 1.8. Sub-clustering of the mesenchymal cluster was performed  
427 as above. The developmental processes were calculated as Dorrity *et al.* described (Dorrity,  
428 2020).

429

### 430 **Single-cell trajectory reconstruction**

431 The single-cell trajectories were reconstructed using Monocle\_ 2.10.1 (Chen et al., 2019,  
432 Trapnell et al., 2014, Qiu et al., 2017). A nonlinear reconstruction algorithm, Discriminative  
433 Dimensionality Reduction with Trees (DDRTree), was used to reconstruct the single-cell  
434 trajectories with genes differentially expressed across four different time points. The state  
435 contains cells from E9.5 embryos were set as time zero, and other cells were ordered across  
436 the trajectory. Differently expressed genes across pseudotime were selected with a q value less  
437 than 0.01. Differential expression analysis between states at branch 1 was performed using the  
438 "Beam" function in Monocle. Differently expressed genes were clustered by pseudotime  
439 expression patterns to draw the heatmaps.

440

#### 441 **Data availability**

442 The single cell RNA-seq datasets have been deposited in the Single-Cell Portal of the Broad  
443 Institute under accession number SCP1367.

444

#### 445 **Acknowledgments**

446 We are grateful to Drs. Bruce Draper and Lesilee Rose (UC Davis BMCDDB program) for their  
447 supports, Bridget Mclaughlin and Jonathan Van Dyke (UC Davis Flow Cytometry Shared  
448 Resource) for conducting fluorescence-activated cell sorting.

449

#### 450 **Additional information**

451 Funding

| <b>Funder</b> | <b>Grant reference number</b> | <b>Author</b> |
|---------------|-------------------------------|---------------|
| NIH/NIDCR     | R01DE026737                   | Chengji Zhou  |

|                                                                                                                                  |             |              |
|----------------------------------------------------------------------------------------------------------------------------------|-------------|--------------|
| NIH/NINDS                                                                                                                        | R01NS102261 | Chengji Zhou |
| Shriners Hospitals for Children                                                                                                  | 85105       | Chengji Zhou |
| The funders had no role in study design, data collection and interpretation, or the decision to submit the work for publication. |             |              |

452

453 Author contributions

454 YJ, Conception and design, Acquisition of data, Analysis and interpretation of data, Drafting or  
455 revising the article; SZ, KR, Acquisition of data, Analysis and interpretation of data, Drafting or  
456 revising the article; RG, MM, MI, YL, TI, RD, HZ, DB, Acquisition of data; YX, Analysis and  
457 interpretation of data, Drafting or revising the article; CZ, Conception and design, Acquisition of  
458 data, Analysis and interpretation of data, Drafting or revising the article.

459

## 460 References

- 461 ADAM, M., POTTER, A. S. & POTTER, S. S. 2017. Psychrophilic proteases dramatically reduce single-cell  
462 RNA-seq artifacts: a molecular atlas of kidney development. *Development*, 144, 3625-3632.
- 463 ALFANDARI, D., COUSIN, H. & MARSDEN, M. 2010. Mechanism of *Xenopus* cranial neural crest cell  
464 migration. *Cell Adh Migr*, 4, 553-60.
- 465 BAGGIOLINI, A., VARUM, S., MATEOS, J. M., BETTOSINI, D., JOHN, N., BONALLI, M., ZIEGLER, U., DIMOU,  
466 L., CLEVERS, H., FURRER, R. & SOMMER, L. 2015. Premigratory and migratory neural crest cells  
467 are multipotent in vivo. *Cell Stem Cell*, 16, 314-22.
- 468 BAKER, C. V. & BRONNER-FRASER, M. 2001. Vertebrate cranial placodes I. Embryonic induction. *Dev Biol*,  
469 232, 1-61.
- 470 BAKKER, E. R., RAGHOEBIR, L., FRANKEN, P. F., HELVENSTEIJN, W., VAN GURP, L., MEIJLINK, F., VAN DER  
471 VALK, M. A., ROTTIER, R. J., KUIPERS, E. J., VAN VEELEN, W. & SMITS, R. 2012. Induced *Wnt5a*  
472 expression perturbs embryonic outgrowth and intestinal elongation, but is well-tolerated in  
473 adult mice. *Dev Biol*, 369, 91-100.
- 474 BERNSTEIN, B. E., MIKKELSEN, T. S., XIE, X., KAMAL, M., HUEBERT, D. J., CUFF, J., FRY, B., MEISSNER, A.,  
475 WERNIG, M., PLATH, K., JAENISCH, R., WAGSCHAL, A., FEIL, R., SCHREIBER, S. L. & LANDER, E. S.  
476 2006. A bivalent chromatin structure marks key developmental genes in embryonic stem cells.  
477 *Cell*, 125, 315-26.
- 478 BURSTYN-COHEN, T. & KALCHEIM, C. 2002. Association between the cell cycle and neural crest  
479 delamination through specific regulation of G1/S transition. *Dev Cell*, 3, 383-95.
- 480 BUTLER, A., HOFFMAN, P., SMIBERT, P., PAPALEXI, E. & SATIJA, R. 2018. Integrating single-cell  
481 transcriptomic data across different conditions, technologies, and species. *Nat Biotechnol*, 36,  
482 411-420.
- 483 CHAI, Y. & MAXSON, R. E., JR. 2006. Recent advances in craniofacial morphogenesis. *Dev Dyn*, 235, 2353-  
484 75.
- 485 CHEN, G., ISHAN, M., YANG, J., KISHIGAMI, S., FUKUDA, T., SCOTT, G., RAY, M. K., SUN, C., CHEN, S. Y.,  
486 KOMATSU, Y., MISHINA, Y. & LIU, H. X. 2017. Specific and spatial labeling of *P0-Cre* versus *Wnt1-  
487 Cre* in cranial neural crest in early mouse embryos. *Genesis*, 55.
- 488 CHEN, G., NING, B. & SHI, T. 2019. Single-Cell RNA-Seq Technologies and Related Computational Data  
489 Analysis. *Front Genet*, 10, 317.
- 490 CORDERO, D. R., BRUGMANN, S., CHU, Y., BAJPAI, R., JAME, M. & HELMS, J. A. 2011. Cranial neural crest  
491 cells on the move: their roles in craniofacial development. *Am J Med Genet A*, 155A, 270-9.
- 492 CRANE, J. F. & TRAINOR, P. A. 2006. Neural crest stem and progenitor cells. *Annu Rev Cell Dev Biol*, 22,  
493 267-86.
- 494 CREUZET, S., SCHULER, B., COULY, G. & LE DOUARIN, N. M. 2004. Reciprocal relationships between *Fgf8*  
495 and neural crest cells in facial and forebrain development. *Proc Natl Acad Sci U S A*, 101, 4843-7.
- 496 DASH, S. & TRAINOR, P. A. 2020. The development, patterning and evolution of neural crest cell  
497 differentiation into cartilage and bone. *Bone*, 137, 115409.
- 498 DEBBACHE, J., PARFEJEVS, V. & SOMMER, L. 2018. *Cre*-driver lines used for genetic fate mapping of  
499 neural crest cells in the mouse: An overview. *Genesis*, 56, e23105.
- 500 DELILE, J., RAYON, T., MELCHIONDA, M., EDWARDS, A., BRISCOE, J. & SAGNER, A. 2019. Single cell  
501 transcriptomics reveals spatial and temporal dynamics of gene expression in the developing  
502 mouse spinal cord. *Development*, 146.
- 503 DORRITY, M. Temperature stress introduces variability in embryogenesis via cell type-specific effects on  
504 developmental rate SDB 79th Annual Meeting, 2020.

- 505 EVERSON, J. L., FINK, D. M., CHUNG, H. M., SUN, M. R. & LIPINSKI, R. J. 2018. Identification of sonic  
506 hedgehog-regulated genes and biological processes in the cranial neural crest mesenchyme by  
507 comparative transcriptomics. *BMC Genomics*, 19, 497.
- 508 FOPPIANO, S., HU, D. & MARCUCIO, R. S. 2007. Signaling by bone morphogenetic proteins directs  
509 formation of an ectodermal signaling center that regulates craniofacial development. *Dev Biol*,  
510 312, 103-14.
- 511 GARDA, A. L., PUELLES, L., RUBENSTEIN, J. L. & MEDINA, L. 2002. Expression patterns of Wnt8b and  
512 Wnt7b in the chicken embryonic brain suggest a correlation with forebrain patterning centers  
513 and morphogenesis. *Neuroscience*, 113, 689-98.
- 514 GRAF, D., MALIK, Z., HAYANO, S. & MISHINA, Y. 2016. Common mechanisms in development and  
515 disease: BMP signaling in craniofacial development. *Cytokine Growth Factor Rev*, 27, 129-39.
- 516 GULATI, G. S., SIKANDAR, S. S., WESCHE, D. J., MANJUNATH, A., BHARADWAJ, A., BERGER, M. J., ILAGAN,  
517 F., KUO, A. H., HSIEH, R. W., CAI, S., ZABALA, M., SCHEEREN, F. A., LOBO, N. A., QIAN, D., YU, F.  
518 B., DIRBAS, F. M., CLARKE, M. F. & NEWMAN, A. M. 2020. Single-cell transcriptional diversity is a  
519 hallmark of developmental potential. *Science*, 367, 405-411.
- 520 HARDWICK, L. J. & PHILPOTT, A. 2014. Nervous decision-making: to divide or differentiate. *Trends Genet*,  
521 30, 254-61.
- 522 HARI, L., MIESCHER, I., SHAKHOVA, O., SUTER, U., CHIN, L., TAKETO, M., RICHARDSON, W. D., KESSARIS,  
523 N. & SOMMER, L. 2012. Temporal control of neural crest lineage generation by Wnt/beta-  
524 catenin signaling. *Development*, 139, 2107-17.
- 525 HO, H. Y., SUSMAN, M. W., BIKOFF, J. B., RYU, Y. K., JONAS, A. M., HU, L., KURUVILLA, R. & GREENBERG,  
526 M. E. 2012. Wnt5a-Ror-Dishevelled signaling constitutes a core developmental pathway that  
527 controls tissue morphogenesis. *Proc Natl Acad Sci U S A*, 109, 4044-51.
- 528 HU, D. & MARCUCIO, R. S. 2009. A SHH-responsive signaling center in the forebrain regulates  
529 craniofacial morphogenesis via the facial ectoderm. *Development*, 136, 107-16.
- 530 IKEYA, M., LEE, S. M., JOHNSON, J. E., MCMAHON, A. P. & TAKADA, S. 1997. Wnt signalling required for  
531 expansion of neural crest and CNS progenitors. *Nature*, 389, 966-70.
- 532 JANKOVIC, V., CIARROCCHI, A., BOCCUNI, P., DEBLASIO, T., BENEZRA, R. & NIMER, S. D. 2007. Id1  
533 restrains myeloid commitment, maintaining the self-renewal capacity of hematopoietic stem  
534 cells. *Proc Natl Acad Sci U S A*, 104, 1260-5.
- 535 JAVED, A., CHEN, H. & GHORI, F. Y. 2010. Genetic and transcriptional control of bone formation. *Oral*  
536 *Maxillofac Surg Clin North Am*, 22, 283-93, v.
- 537 JEAN-BAPTISTE, K., MCFALINE-FIGUEROA, J. L., ALEXANDRE, C. M., DORRITY, M. W., SAUNDERS, L.,  
538 BUBB, K. L., TRAPNELL, C., FIELDS, S., QUEITSCH, C. & CUPERUS, J. T. 2019. Dynamics of Gene  
539 Expression in Single Root Cells of *Arabidopsis thaliana*. *Plant Cell*, 31, 993-1011.
- 540 JHEON, A. H. & SCHNEIDER, R. A. 2009. The cells that fill the bill: neural crest and the evolution of  
541 craniofacial development. *J Dent Res*, 88, 12-21.
- 542 JI, Y., GARLAND, M. A., SUN, B., ZHANG, S., REYNOLDS, K., MCMAHON, M., RAJAKUMAR, R., ISLAM, M.  
543 S., LIU, Y., CHEN, Y. & ZHOU, C. J. 2020. Cellular and developmental basis of orofacial clefts. *Birth*  
544 *Defects Res*.
- 545 JI, Y., HAO, H., REYNOLDS, K., MCMAHON, M. & ZHOU, C. J. 2019. Wnt Signaling in Neural Crest  
546 Ontogenesis and Oncogenesis. *Cells*, 8.
- 547 KASBERG, A. D., BRUNSKILL, E. W. & STEVEN POTTER, S. 2013. SP8 regulates signaling centers during  
548 craniofacial development. *Dev Biol*, 381, 312-23.
- 549 KAUCKA, M., IVASHKIN, E., GYLLBORG, D., ZIKMUND, T., TESAROVA, M., KAISER, J., XIE, M., PETERSEN, J.,  
550 PACHNIS, V., NICOLIS, S. K., YU, T., SHARPE, P., ARENAS, E., BRISMAR, H., BLOM, H., CLEVERS, H.,  
551 SUTER, U., CHAGIN, A. S., FRIED, K., HELLANDER, A. & ADAMEYKO, I. 2016. Analysis of neural  
552 crest-derived clones reveals novel aspects of facial development. *Sci Adv*, 2, e1600060.

- 553 KIM, H., LANGOHR, I. M., FAISAL, M., MCNULTY, M., THORN, C. & KIM, J. 2018. Ablation of Ezh2 in neural  
554 crest cells leads to aberrant enteric nervous system development in mice. *PLoS One*, 13,  
555 e0203391.
- 556 KIRBY, M. L. & HUTSON, M. R. 2010. Factors controlling cardiac neural crest cell migration. *Cell Adh Migr*,  
557 4, 609-21.
- 558 KRISPIN, S., NITZAN, E., KASSEM, Y. & KALCHEIM, C. 2010. Evidence for a dynamic spatiotemporal fate  
559 map and early fate restrictions of premigratory avian neural crest. *Development*, 137, 585-95.
- 560 LA NOCE, M., MELE, L., TIRINO, V., PAINO, F., DE ROSA, A., NADDEO, P., PAPAGERAKIS, P., PAPACCIO, G.  
561 & DESIDERIO, V. 2014. Neural crest stem cell population in craniomaxillofacial development and  
562 tissue repair. *Eur Cell Mater*, 28, 348-57.
- 563 LANGENBACH, G. E. & VAN EIJDEN, T. M. 2001. Mammalian feeding motor patterns. *American Zoologist*,  
564 41, 1338-1351.
- 565 LEWIS, A. E., VASUDEVAN, H. N., O'NEILL, A. K., SORIANO, P. & BUSH, J. O. 2013. The widely used Wnt1-  
566 Cre transgene causes developmental phenotypes by ectopic activation of Wnt signaling. *Dev*  
567 *Biol*, 379, 229-34.
- 568 LI, H., JONES, K. L., HOOPER, J. E. & WILLIAMS, T. 2019. The molecular anatomy of mammalian upper lip  
569 and primary palate fusion at single cell resolution. *Development*, 146.
- 570 LI, X., HUANG, M., ZHENG, H., WANG, Y., REN, F., SHANG, Y., ZHAI, Y., IRWIN, D. M., SHI, Y., CHEN, D. &  
571 CHANG, Z. 2008. CHIP promotes Runx2 degradation and negatively regulates osteoblast  
572 differentiation. *J Cell Biol*, 181, 959-72.
- 573 LOGAN, C., WINGATE, R. J., MCKAY, I. J. & LUMSDEN, A. 1998. Tlx-1 and Tlx-3 homeobox gene  
574 expression in cranial sensory ganglia and hindbrain of the chick embryo: markers of patterned  
575 connectivity. *J Neurosci*, 18, 5389-402.
- 576 LUMB, R., BUCKBERRY, S., SECKER, G., LAWRENCE, D. & SCHWARZ, Q. 2017. Transcriptome profiling  
577 reveals expression signatures of cranial neural crest cells arising from different axial levels. *BMC*  
578 *Dev Biol*, 17, 5.
- 579 LUMSDEN, A., SPRAWSON, N. & GRAHAM, A. 1991. Segmental origin and migration of neural crest cells  
580 in the hindbrain region of the chick embryo. *Development*, 113, 1281-91.
- 581 MIYAKOSHI, N., RICHMAN, C., KASUKAWA, Y., LINKHART, T. A., BAYLINK, D. J. & MOHAN, S. 2001.  
582 Evidence that IGF-binding protein-5 functions as a growth factor. *J Clin Invest*, 107, 73-81.
- 583 MUZUMDAR, M. D., TASIC, B., MIYAMICHI, K., LI, L. & LUO, L. 2007. A global double-fluorescent Cre  
584 reporter mouse. *Genesis*, 45, 593-605.
- 585 NAKASHIMA, K., TAKIZAWA, T., OCHIAI, W., YANAGISAWA, M., HISATSUNE, T., NAKAFUKU, M.,  
586 MIYAZONO, K., KISHIMOTO, T., KAGEYAMA, R. & TAGA, T. 2001. BMP2-mediated alteration in  
587 the developmental pathway of fetal mouse brain cells from neurogenesis to astrocytogenesis.  
588 *Proc Natl Acad Sci U S A*, 98, 5868-73.
- 589 NAM, H. S. & BENEZRA, R. 2009. High levels of Id1 expression define B1 type adult neural stem cells. *Cell*  
590 *Stem Cell*, 5, 515-26.
- 591 NESTOROWA, S., HAMEY, F. K., PIJUAN SALA, B., DIAMANTI, E., SHEPHERD, M., LAURENTI, E., WILSON,  
592 N. K., KENT, D. G. & GOTTGENS, B. 2016. A single-cell resolution map of mouse hematopoietic  
593 stem and progenitor cell differentiation. *Blood*, 128, e20-31.
- 594 NITZAN, E., KRISPIN, S., PFALTZGRAFF, E. R., KLAR, A., LABOSKY, P. A. & KALCHEIM, C. 2013. A dynamic  
595 code of dorsal neural tube genes regulates the segregation between neurogenic and  
596 melanogenic neural crest cells. *Development*, 140, 2269-79.
- 597 PAUKLIN, S. & VALLIER, L. 2013. The cell-cycle state of stem cells determines cell fate propensity. *Cell*,  
598 155, 135-47.
- 599 QIU, X., MAO, Q., TANG, Y., WANG, L., CHAWLA, R., PLINER, H. A. & TRAPNELL, C. 2017. Reversed graph  
600 embedding resolves complex single-cell trajectories. *Nat Methods*, 14, 979-982.

- 601 RIDENOUR, D. A., MCLENNAN, R., TEDDY, J. M., SEMERAD, C. L., HAUG, J. S. & KULESA, P. M. 2014. The  
602 neural crest cell cycle is related to phases of migration in the head. *Development*, 141, 1095-  
603 103.
- 604 RUTKOVSKIY, A., STENSLOKKEN, K. O. & VAAGE, I. J. 2016. Osteoblast Differentiation at a Glance. *Med*  
605 *Sci Monit Basic Res*, 22, 95-106.
- 606 SAKATA-GOTO, T., TAKAHASHI, K., KISO, H., HUANG, B., TSUKAMOTO, H., TAKEMOTO, M., HAYASHI, T.,  
607 SUGAI, M., NAKAMURA, T., YOKOTA, Y., SHIMIZU, A., SLAVKIN, H. & BESSHO, K. 2012. Id2  
608 controls chondrogenesis acting downstream of BMP signaling during maxillary morphogenesis.  
609 *Bone*, 50, 69-78.
- 610 SAUNDERS, L. M., MISHRA, A. K., AMAN, A. J., LEWIS, V. M., TOOMEY, M. B., PACKER, J. S., QIU, X.,  
611 MCFALINE-FIGUEROA, J. L., CORBO, J. C., TRAPNELL, C. & PARICHY, D. M. 2019. Thyroid hormone  
612 regulates distinct paths to maturation in pigment cell lineages. *Elife*, 8.
- 613 SCHWARZ, D., VARUM, S., ZEMKE, M., SCHOLER, A., BAGGIOLINI, A., DRAGANOVA, K., KOSEKI, H.,  
614 SCHUBELER, D. & SOMMER, L. 2014. Ezh2 is required for neural crest-derived cartilage and bone  
615 formation. *Development*, 141, 867-77.
- 616 SHIFLETT, L. A., TIEDE-LEWIS, L. M., XIE, Y., LU, Y., RAY, E. C. & DALLAS, S. L. 2019. Collagen Dynamics  
617 During the Process of Osteocyte Embedding and Mineralization. *Front Cell Dev Biol*, 7, 178.
- 618 SHYAMALA, K., YANDURI, S., GIRISH, H. C. & MURGOD, S. 2015. Neural crest: The fourth germ layer. *J*  
619 *Oral Maxillofac Pathol*, 19, 221-9.
- 620 SINGH, A. M., CHAPPELL, J., TROST, R., LIN, L., WANG, T., TANG, J., MATLOCK, B. K., WELLER, K. P., WU,  
621 H., ZHAO, S., JIN, P. & DALTON, S. 2013. Cell-cycle control of developmentally regulated  
622 transcription factors accounts for heterogeneity in human pluripotent cells. *Stem Cell Reports*, 1,  
623 532-44.
- 624 SINGH, M. K., CHRISTOFFELS, V. M., DIAS, J. M., TROWE, M. O., PETRY, M., SCHUSTER-GOSSLER, K.,  
625 BURGER, A., ERICSON, J. & KISPERS, A. 2005. Tbx20 is essential for cardiac chamber  
626 differentiation and repression of Tbx2. *Development*, 132, 2697-707.
- 627 SOLDATOV, R., KAUCKA, M., KASTRITI, M. E., PETERSEN, J., CHONTOROTZEA, T., ENGLMAIER, L.,  
628 AKKURATOVA, N., YANG, Y., HARING, M., DYACHUK, V., BOCK, C., FARLIK, M., PIACENTINO, M.  
629 L., BOISMOREAU, F., HILSCHER, M. M., YOKOTA, C., QIAN, X., NILSSON, M., BRONNER, M. E.,  
630 CROCI, L., HSIAO, W. Y., GUERTIN, D. A., BRUNET, J. F., CONSALEZ, G. G., ERNFORS, P., FRIED, K.,  
631 KHARCHENKO, P. V. & ADAMEYKO, I. 2019. Spatiotemporal structure of cell fate decisions in  
632 murine neural crest. *Science*, 364.
- 633 SOUFI, A. & DALTON, S. 2016. Cycling through developmental decisions: how cell cycle dynamics control  
634 pluripotency, differentiation and reprogramming. *Development*, 143, 4301-4311.
- 635 STUART, T., BUTLER, A., HOFFMAN, P., HAFEMEISTER, C., PAPALEXI, E., MAUCK, W. M., 3RD, HAO, Y.,  
636 STOECKIUS, M., SMIBERT, P. & SATIJA, R. 2019. Comprehensive Integration of Single-Cell Data.  
637 *Cell*, 177, 1888-1902 e21.
- 638 SZABO-ROGERS, H. L., GEETHA-LOGANATHAN, P., NIMMAGADDA, S., FU, K. K. & RICHMAN, J. M. 2008.  
639 FGF signals from the nasal pit are necessary for normal facial morphogenesis. *Dev Biol*, 318, 289-  
640 302.
- 641 TAVARES, A. L. & CLOUTHIER, D. E. 2015. Cre recombinase-regulated Endothelin1 transgenic mouse  
642 lines: novel tools for analysis of embryonic and adult disorders. *Dev Biol*, 400, 191-201.
- 643 TRAPNELL, C., CACCHIARELLI, D., GRIMSBY, J., POKHAREL, P., LI, S., MORSE, M., LENNON, N. J., LIVAK, K.  
644 J., MIKKELSEN, T. S. & RINN, J. L. 2014. The dynamics and regulators of cell fate decisions are  
645 revealed by pseudotemporal ordering of single cells. *Nat Biotechnol*, 32, 381-386.
- 646 TUCKERMANN, J. P., PITTOIS, K., PARTRIDGE, N. C., MERREGAERT, J. & ANGEL, P. 2000. Collagenase-3  
647 (MMP-13) and integral membrane protein 2a (Itm2a) are marker genes of  
648 chondrogenic/osteoblastic cells in bone formation: sequential temporal, and spatial expression



649 of Itm2a, alkaline phosphatase, MMP-13, and osteocalcin in the mouse. *J Bone Miner Res*, 15,  
650 1257-65.

651 VAN AMERONGEN, R., FUERER, C., MIZUTANI, M. & NUSSE, R. 2012. Wnt5a can both activate and  
652 repress Wnt/beta-catenin signaling during mouse embryonic development. *Dev Biol*, 369, 101-  
653 14.

654 VOLKER, L. A., PETRY, M., ABDELSABOUR-KHALAF, M., SCHWEIZER, H., YUSUF, F., BUSCH, T., SCHERMER,  
655 B., BENZING, T., BRAND-SABERI, B., KRETZ, O., HOHNE, M. & KISPERT, A. 2012. Comparative  
656 analysis of Neph gene expression in mouse and chicken development. *Histochem Cell Biol*, 137,  
657 355-66.

658 YING, Q. L., NICHOLS, J., CHAMBERS, I. & SMITH, A. 2003. BMP induction of Id proteins suppresses  
659 differentiation and sustains embryonic stem cell self-renewal in collaboration with STAT3. *Cell*,  
660 115, 281-92.

661 ZHAO, Y., KWAN, K. M., MAILLOUX, C. M., LEE, W. K., GRINBERG, A., WURST, W., BEHRINGER, R. R. &  
662 WESTPHAL, H. 2007. LIM-homeodomain proteins Lhx1 and Lhx5, and their cofactor Ldb1,  
663 control Purkinje cell differentiation in the developing cerebellum. *Proc Natl Acad Sci U S A*, 104,  
664 13182-6.

665

666

667 **Figures and legends**

668 **Figure 1.** Single-cell transcriptional atlas of mouse NC cells. (A) Experimental workflow. NC  
669 cells were genetically labeled by Wnt1-Cre;Rosa26-mT/mG reporter. EGFP positive cells from  
670 E9.5, E10.5, E11.5, and E12.5 embryos were collected using fluorescent-activated cell sorting  
671 and performed 10X single-cell RNA sequencing. (B) UMAP plot for each time point. Non-NCCs  
672 were excluded from the following analysis based on expressed marker genes. (C) UMAP plot of  
673 19,640 eGFP positive cells from four-time points. Cells are colored by time point.

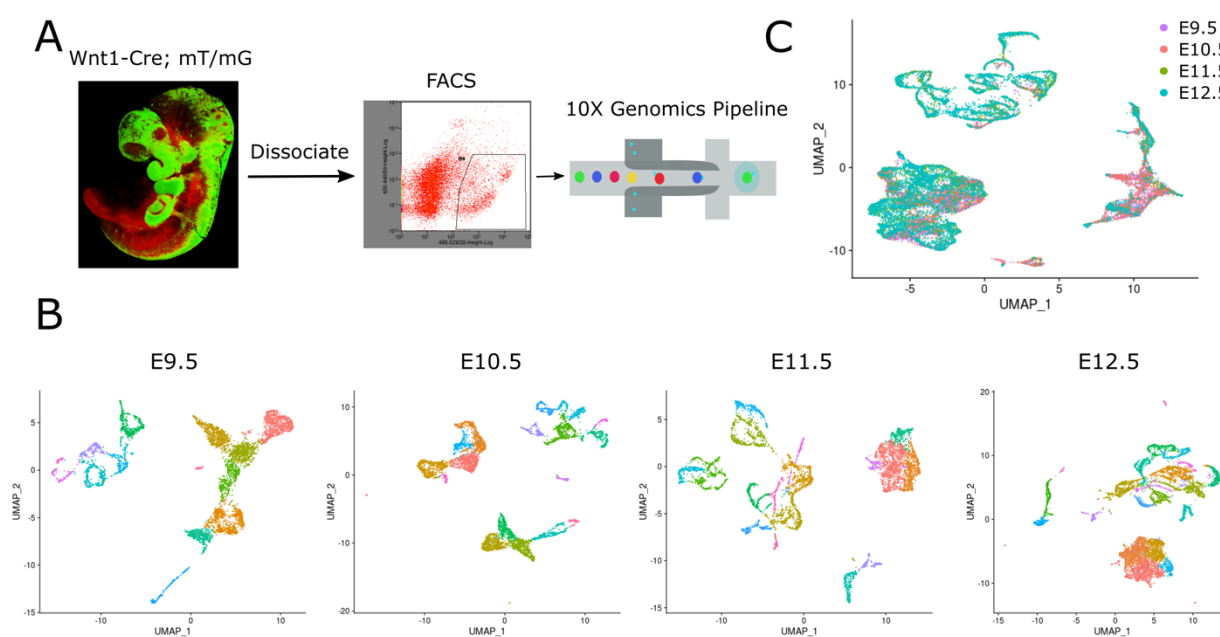

674

675

676 **Figure 2.** Single-cell RNA-seq identifies major NC-derived cell types. (A) UMAP plot of NC cells  
 677 from four-time points. Cells are colored by major NC-derived cell types inferred from expressed  
 678 marker genes. (B) Feature plots and dot plots of marker genes for each major cell population.  
 679 (C) Histogram showing the fraction of different cell types in G1 (Blue), G2M (Orange), or S  
 680 (Grey) phase. (D) The fraction of cell type at each time point, showing a decrease of pre-EMT  
 681 and early migration NC cells after E11.5.

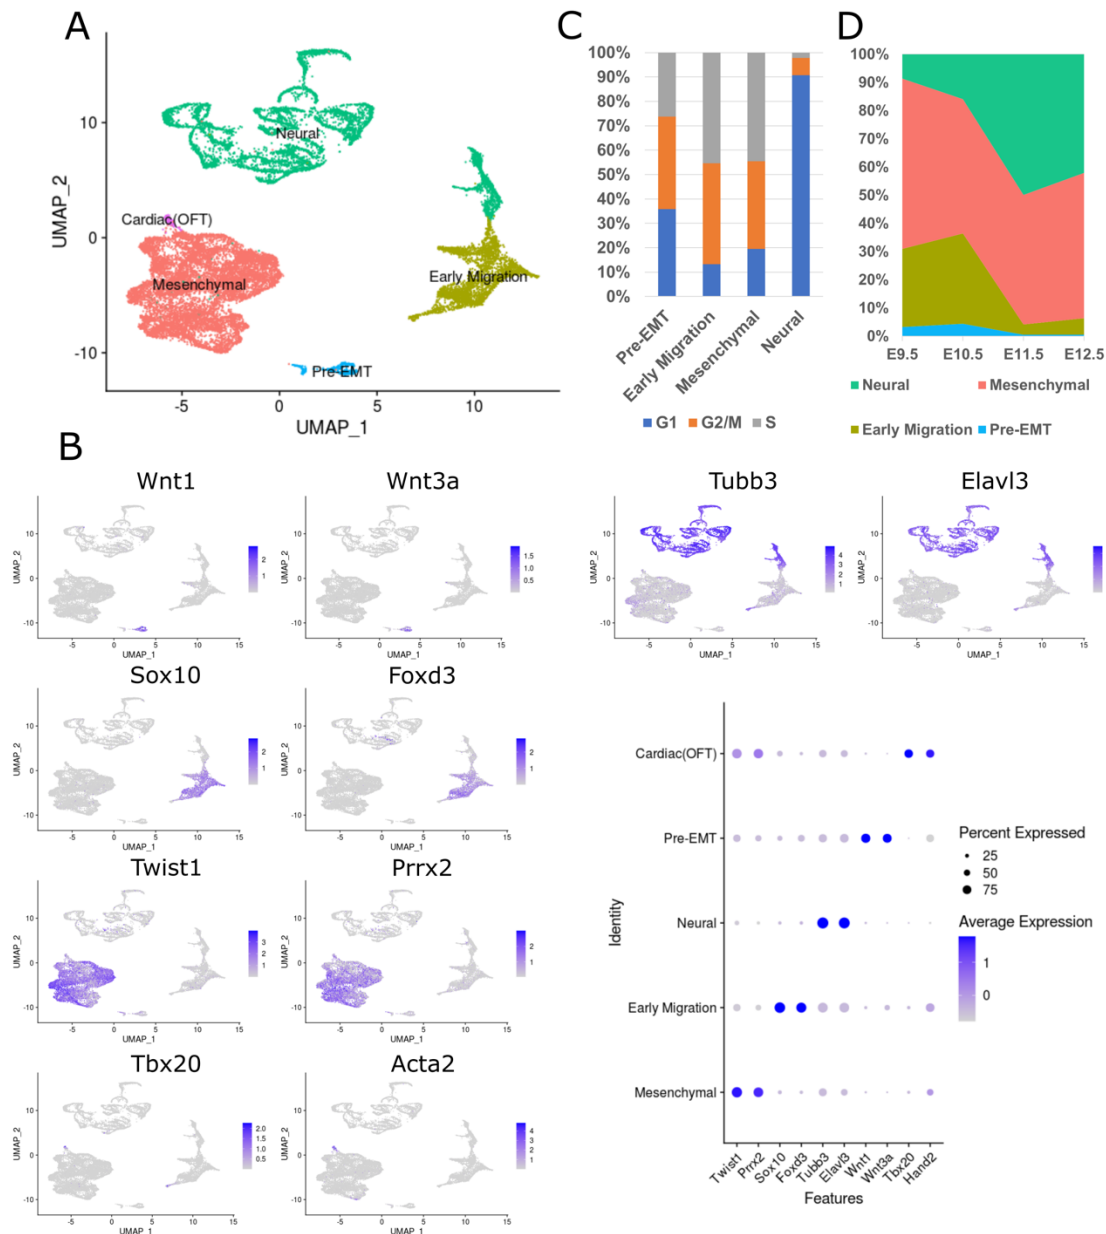

682

683

684 **Figure 3.** Developmental trajectories of NC cells. (A, B) Monocle pseudotime trajectory of NC  
 685 cells from four-time points. Cells are colored by state (A) or pseudotime (B). (C) Monocle  
 686 pseudotime trajectory showing the progression of pre-EMT, early migrating NC cells,  
 687 mesenchymal, and neural lineages derived from NC cells. (D) Expression heatmap showing  
 688 gene markers that link NC clusters to developmental states.

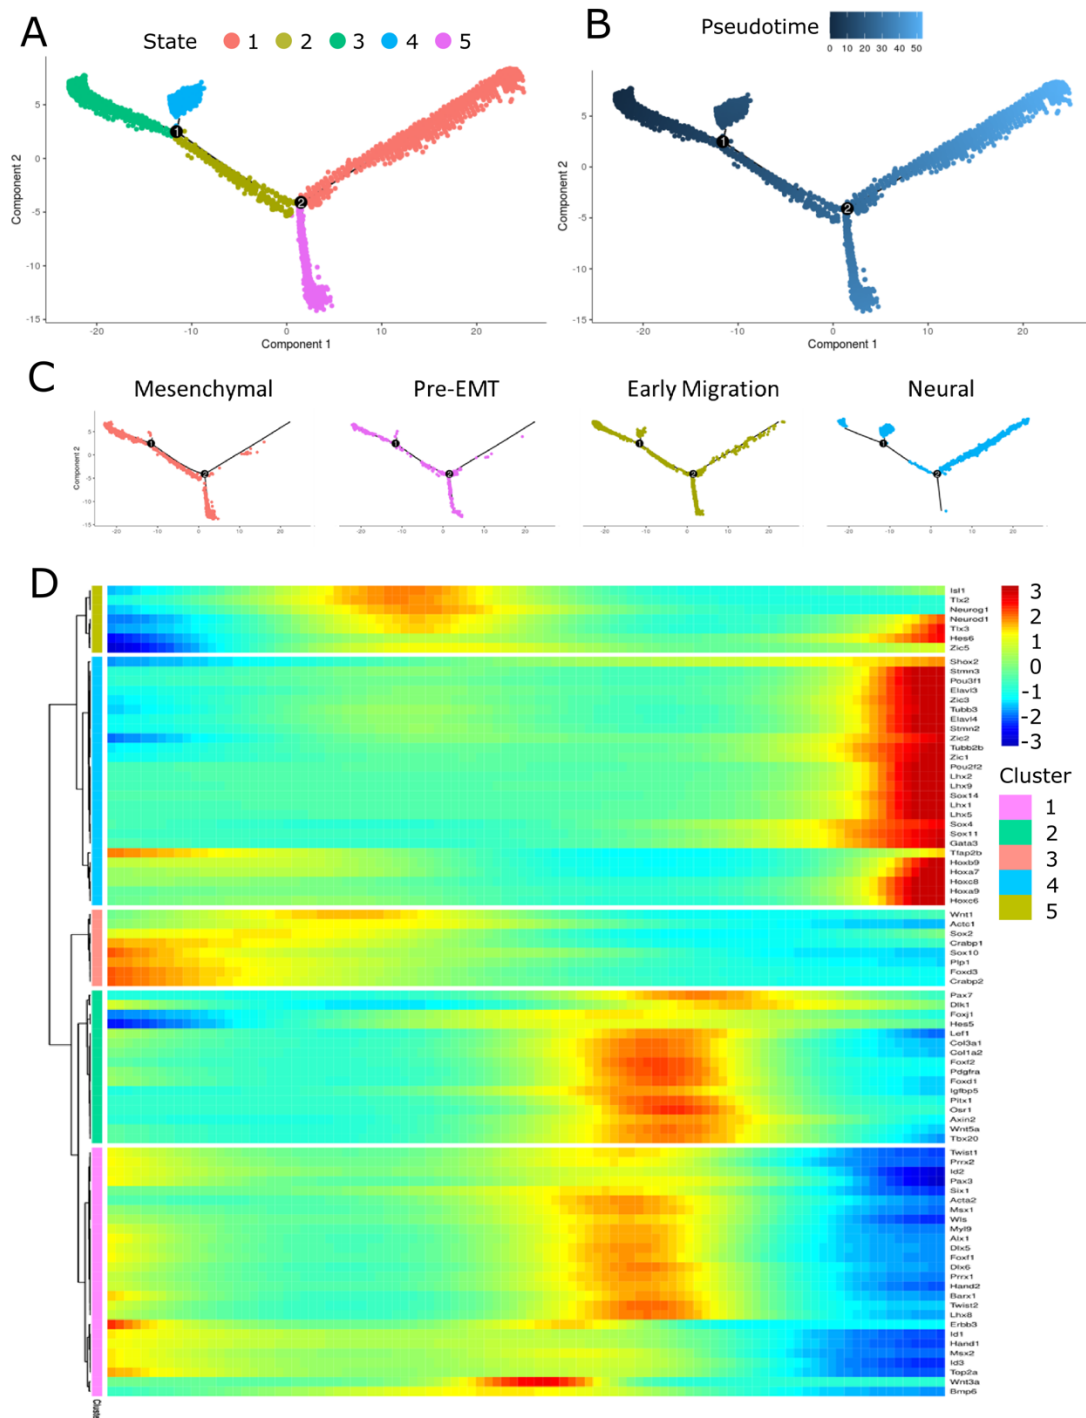

689

690 **Figure 4.** Single-cell RNA-seq identifies major NC-derived mesenchymal cells at facial  
 691 primordia. (A, B) UMAP plot of 9,875 NC-derived mesenchymal cells showing 15 different cell  
 692 populations. Cells are colored by mesenchymal clusters (A) or time point (B). (C) Identifying the  
 693 mesenchymal clusters using wholemount *in situ* hybridization. Left panels, feature plots for  
 694 marker genes. Right panels, wholemount *in situ* hybridization results for indicated genes at  
 695 E10.5 and E11.5. Scale bar: 0.5mm

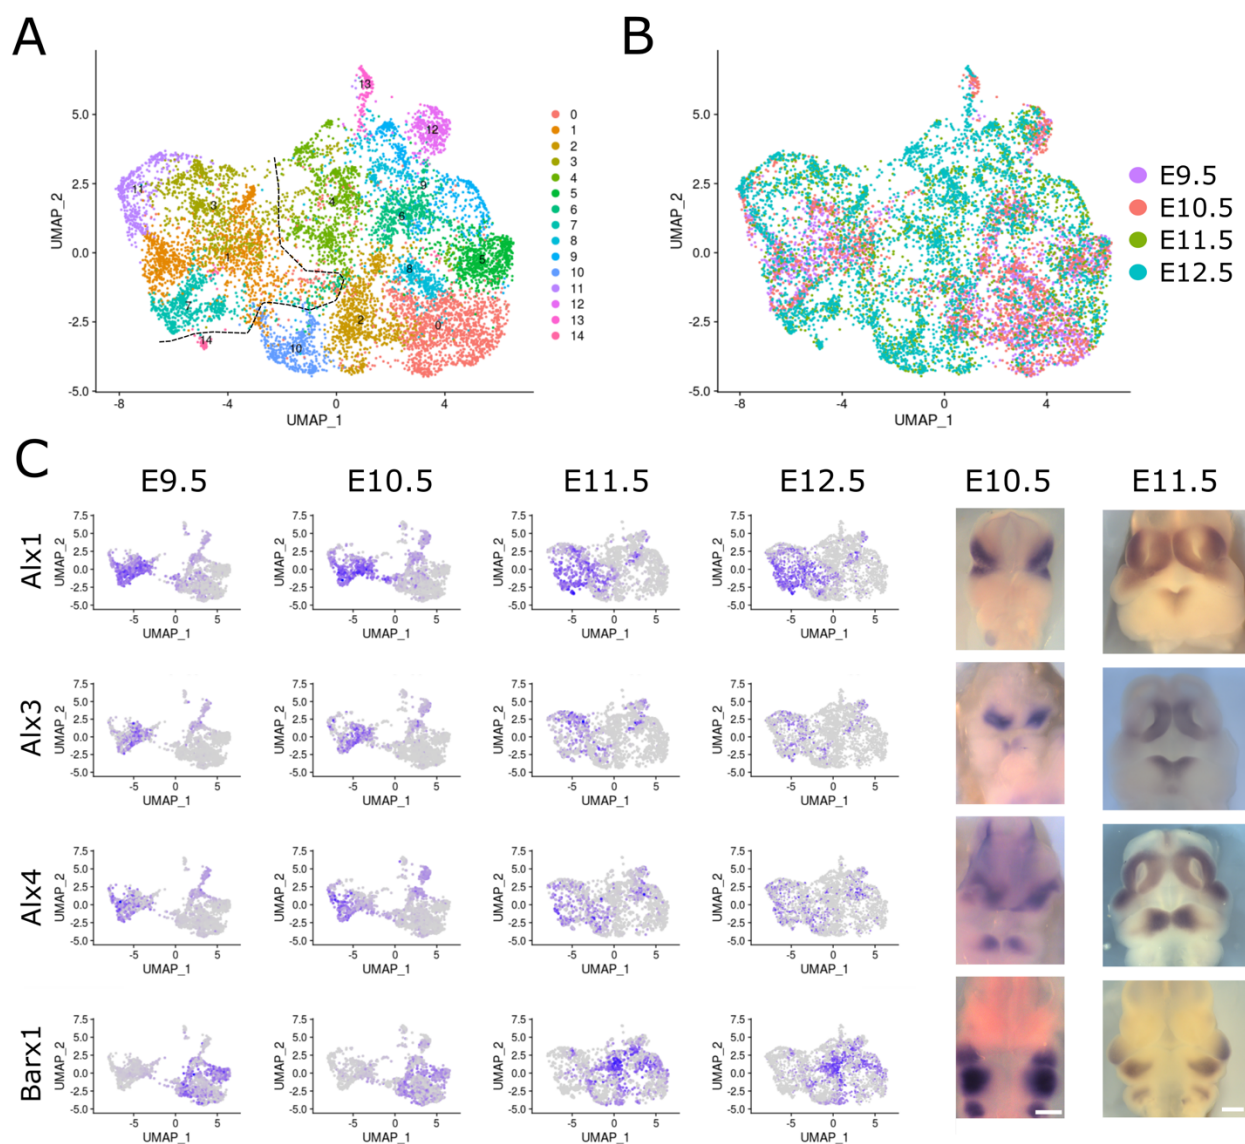

696

697

698 **Figure 5.** The differentiation of NC-derived craniofacial mesenchymal cells starts at late  
 699 developmental stages. (A-C) Monocle pseudotime trajectory of NC-derived craniofacial  
 700 mesenchymal cells from four-time points. Cells are colored by state (A), pseudotime (B), or time  
 701 point (C). (D) Global analysis of gene expression along the trajectory identified over 10,000  
 702 genes exhibits temporal expression patterns. (E) Pseudotime kinetics show the expression of  
 703 known gene markers of the cell cycle and differentiation process. (F, G) Feature plot (F) and  
 704 histograms (G) showing the developmental progression increased after E11.5 using a  
 705 developmental progression score for each cell. Wilcoxon rank sum test was used to compare  
 706 samples from each time point with E9.5 sample. \*\*\* =  $p < e^{-14}$

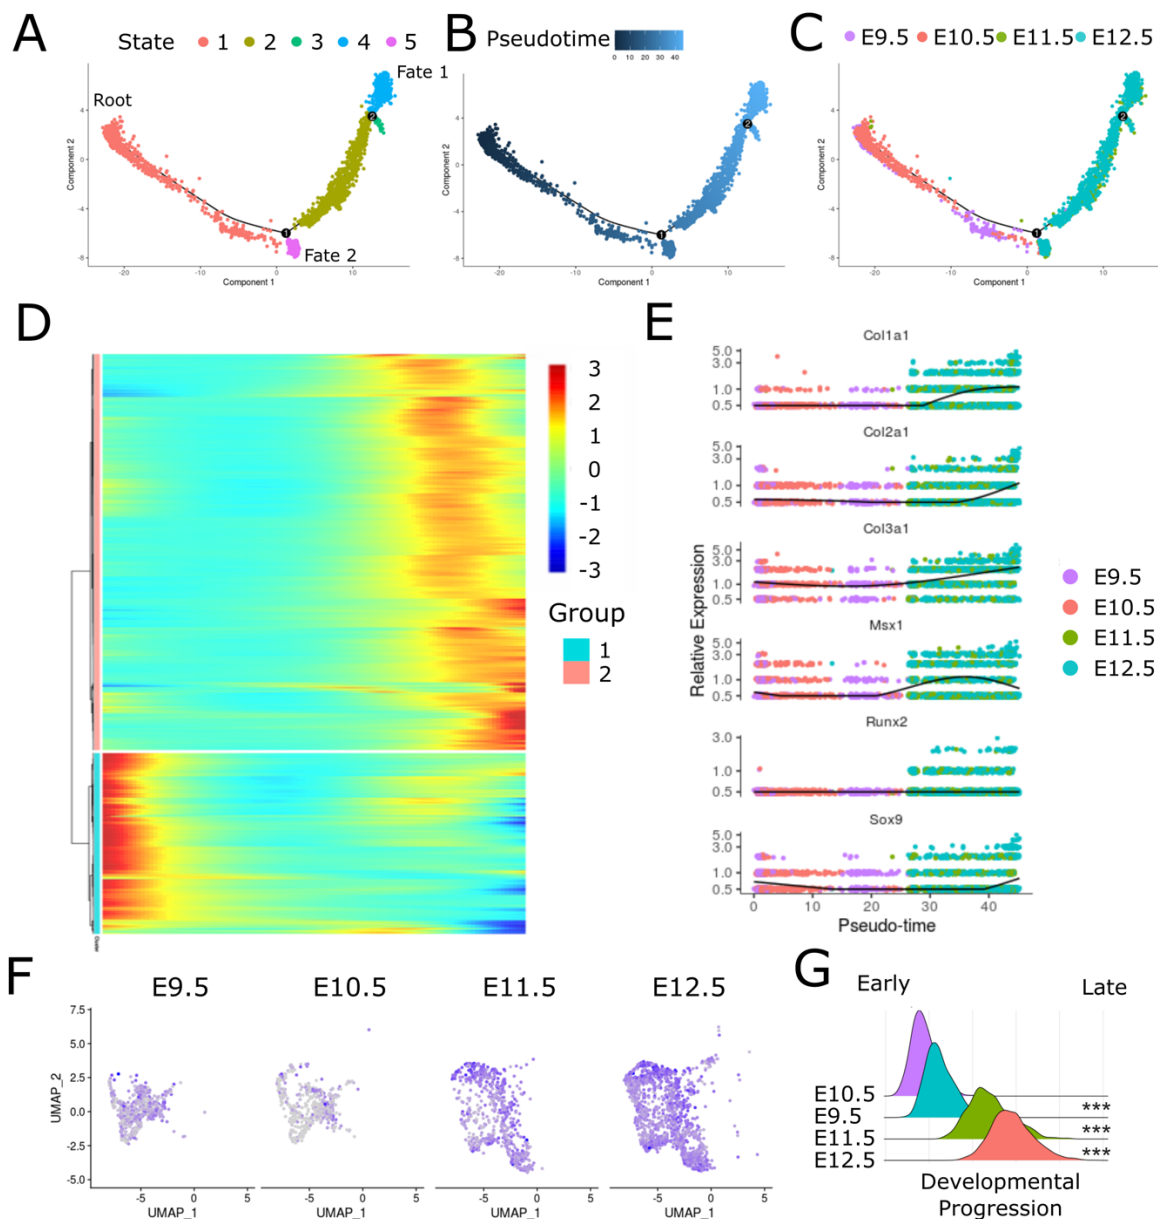

707

709 **Figure 6.** Branch 1 is a decision-making point governing whether a cell exits the cell cycle (A)  
 710 Expression heatmap showing genes expressed in a branch 1 -dependent manner. Pre-branch  
 711 refers to the cells before the branch. Gene ontology (GO) enrichment analysis for genes from  
 712 each cell fate is shown (Right panel). (B) Pseudotime kinetics show the expression of known  
 713 gene markers of the cell cycle and differentiation process from the root of the trajectory to fate 1  
 714 (solid line) or fate 2 (dotted line). (C) Pseudotime trajectory of craniofacial mesenchymal cells  
 715 from four-time points. Cells are colored by the cell cycle phase. (D) Histogram showing the  
 716 fraction of cells in G1 (Blue), G2M (Orange), or S (Grey) phase at each time point.

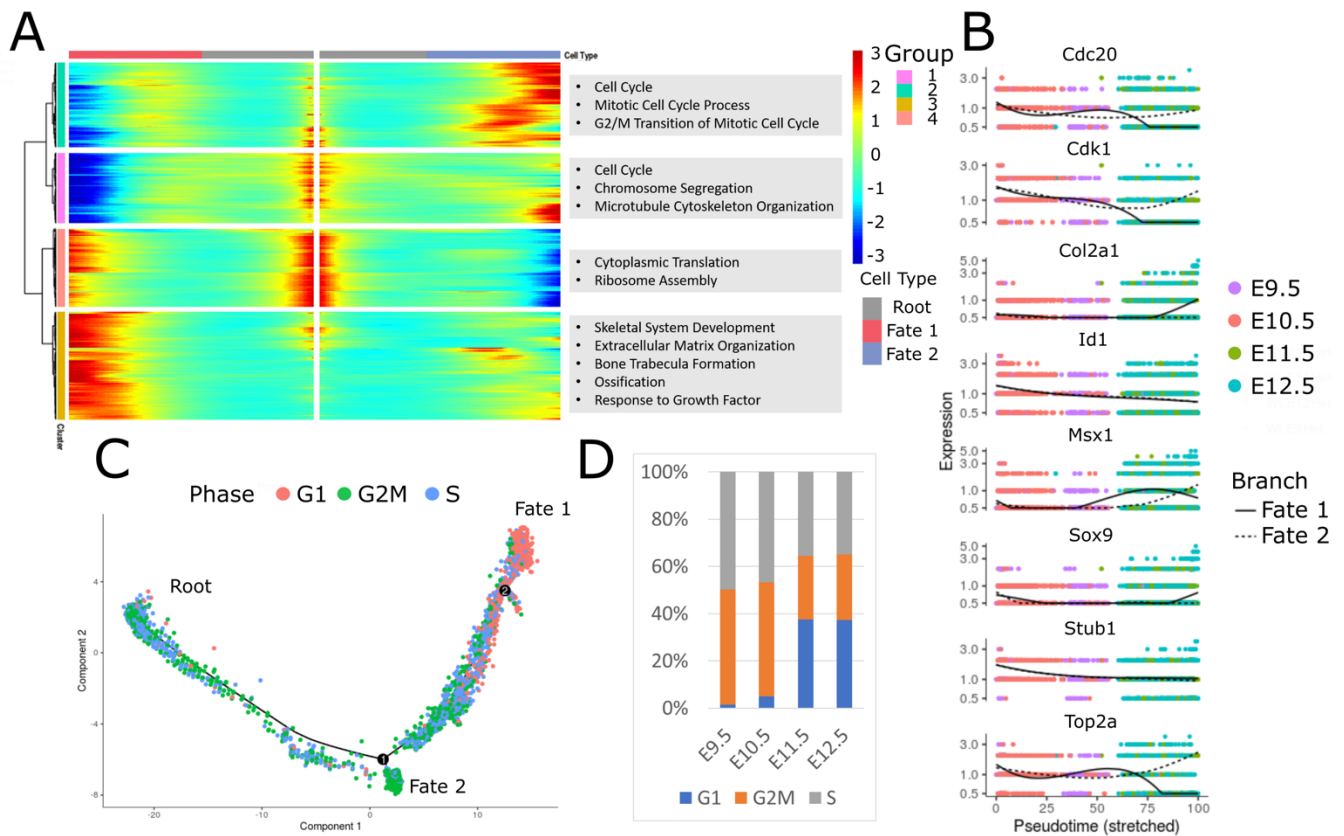

717

718

719

720 **Figure 7.** High reproducibility between Wnt1-Cre and Sox10-Cre scRNA-seq dataset at E11.5.  
 721 (A) Confocal imaging shows Sox10-Cre marks migratory NC cells and their progeny. (B) UMAP  
 722 plot shows the transcriptional dynamics are similar between Wnt1-Cre and Sox10-Cre scRNA-  
 723 seq dataset. (C) Distributions of the number of UMIs and genes detected in the two datasets is  
 724 similar. (D) Scatter plot shows the average expression of each gene in each cell is similar  
 725 between the two datasets. (E) Pie charts show that the percentages of each cell type are  
 726 similar. (F) Feature plots of marker genes show the expression patterns of these genes are  
 727 similar between the two datasets.

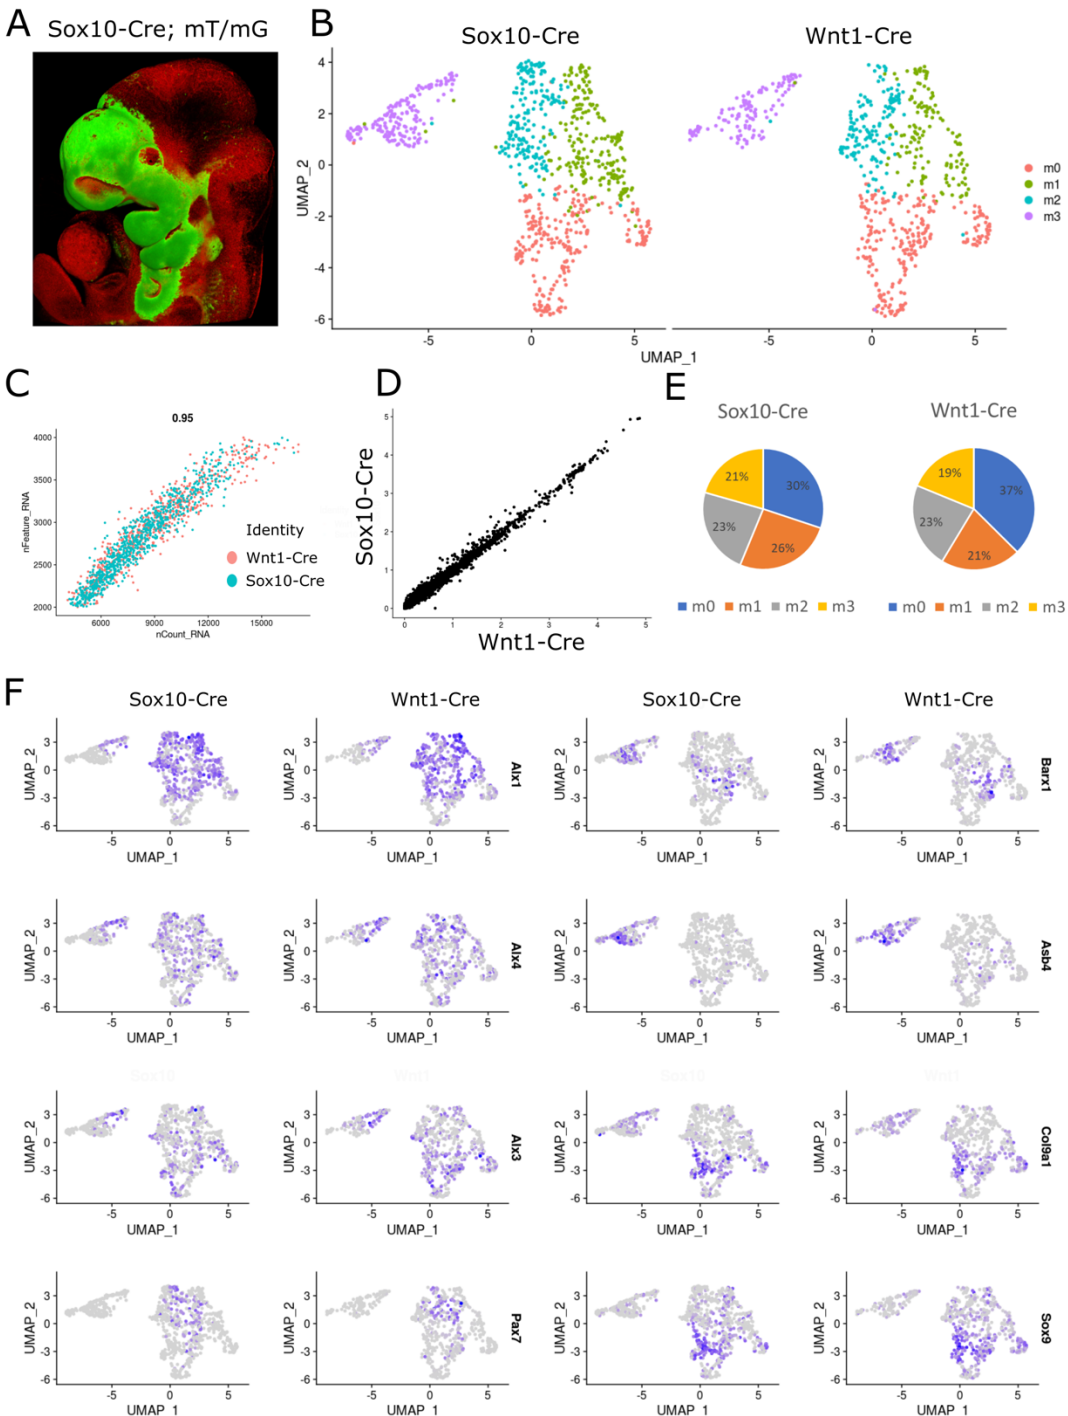

728



729 **Figure 8.** The development of craniofacial mesenchymal cells is associated with cell cycle  
 730 progression at E11.5. (A) UMAP plot of NC-derived craniofacial mesenchymal cells from E11.5  
 731 embryos. (B) Gene expression heatmap of top 10 marker genes for each cluster. (C)  
 732 Segregation of craniofacial mesenchymal cells by cell cycle phase. (D) Quantification of the  
 733 proportion of different cell types in G1 (Blue), G2M (Orange), or S (Grey) phase. (E) Histograms  
 734 showing the developmental progression score for each cell type. Wilcoxon rank sum test was  
 735 used to compare cells from each cluster with m2. \*\*\* =  $p < e^{-14}$ , \*\* =  $p < e^{-3}$  (F, G) Volcano plots  
 736 showing differentially expressed genes between m2 and m0 (F) or m2 and m1 (G). Highly  
 737 expressed genes ( $\text{avg\_logFC} > 0.5$ ,  $P \text{ adj} < 0.05$ ) are colored in blue (in m2) or red (in m0 or  
 738 m1) dots, respectively.

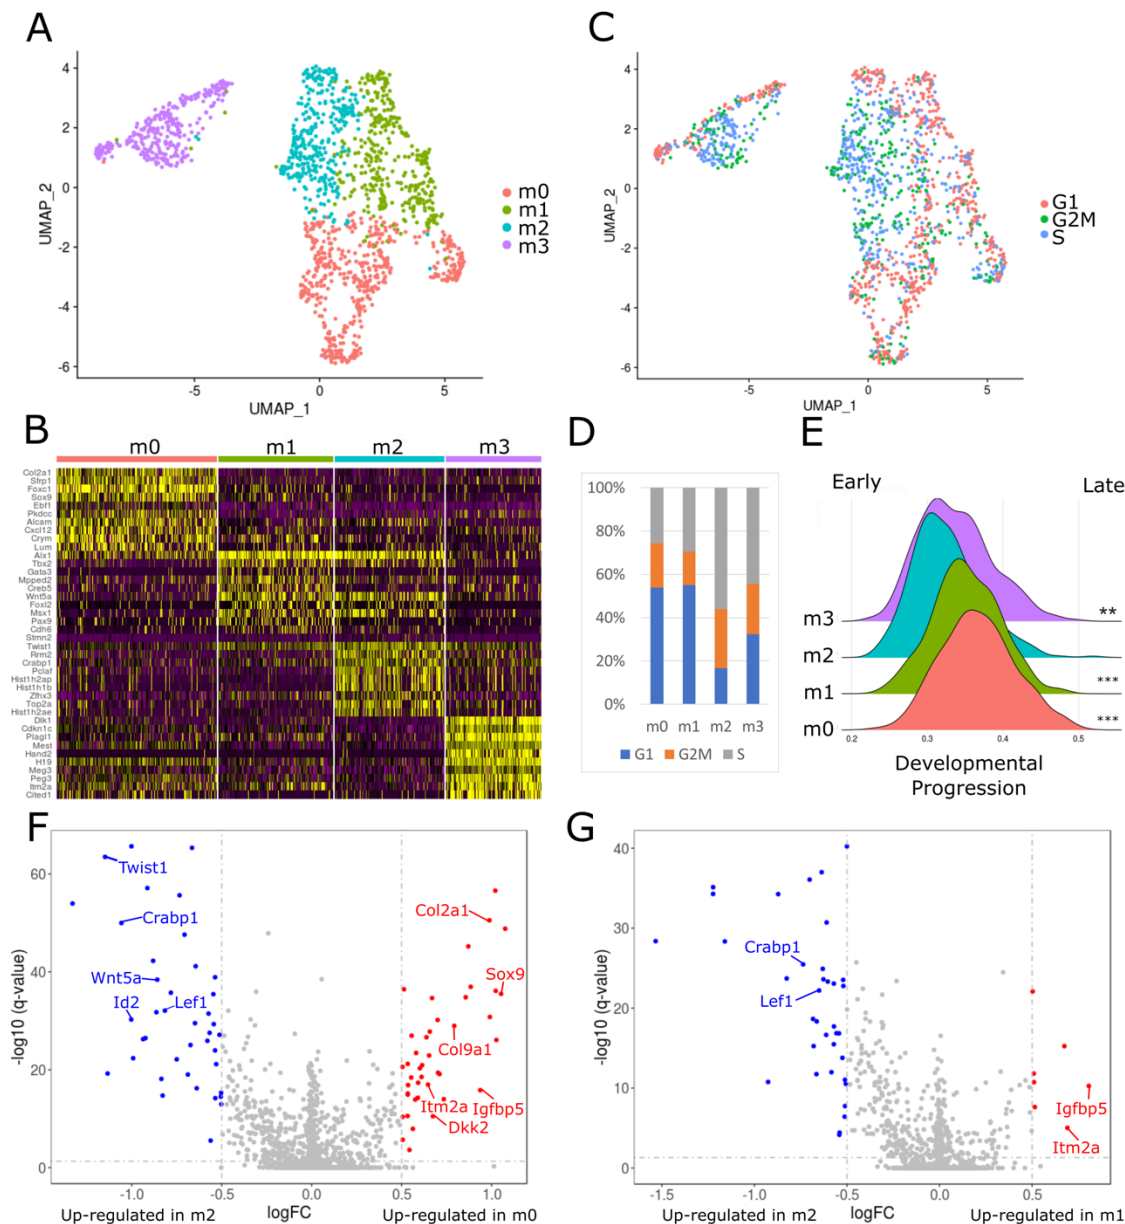

739

740 **Figure S1.** Violin plots for quality control metrics of single cell RNA-seq, including the number of  
741 unique molecular identifiers (UMIs) (Left), number of genes (Middle), and percentage of  
742 mitochondrial genes (Right) at each age of E9.5~E12.5.

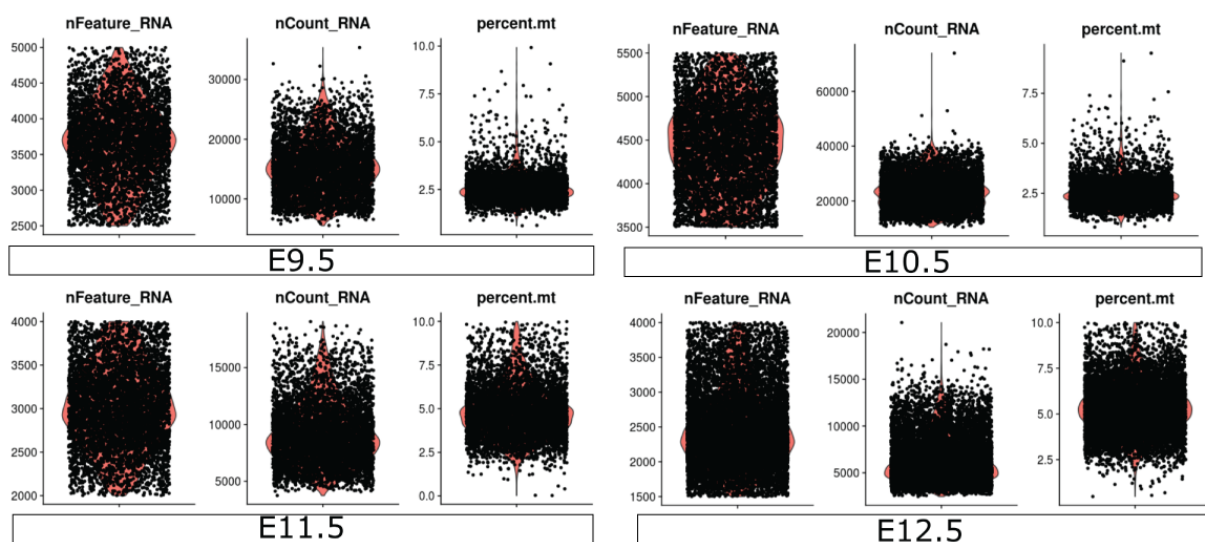

743

744

745 **Figure S2.** Heatmap showing the expression of the top 10 marker genes for each cell type. The  
746 identity of each cluster is labeled on the top of each column.

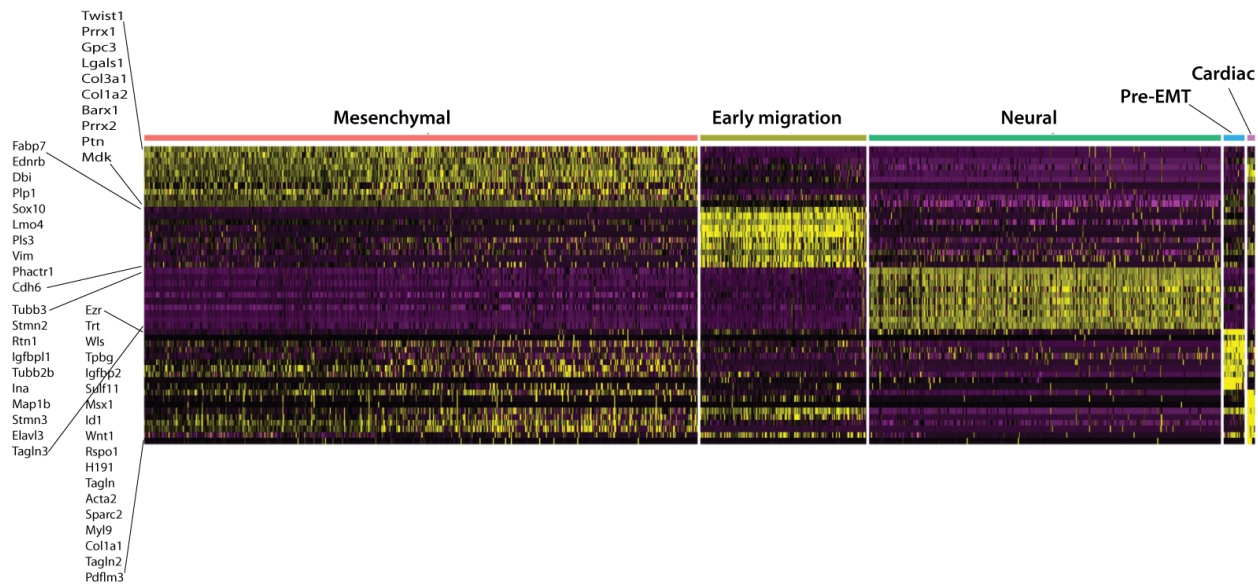

749 **Figure S3.** Heatmap of genes used to define the cell cycle phase for each cell.

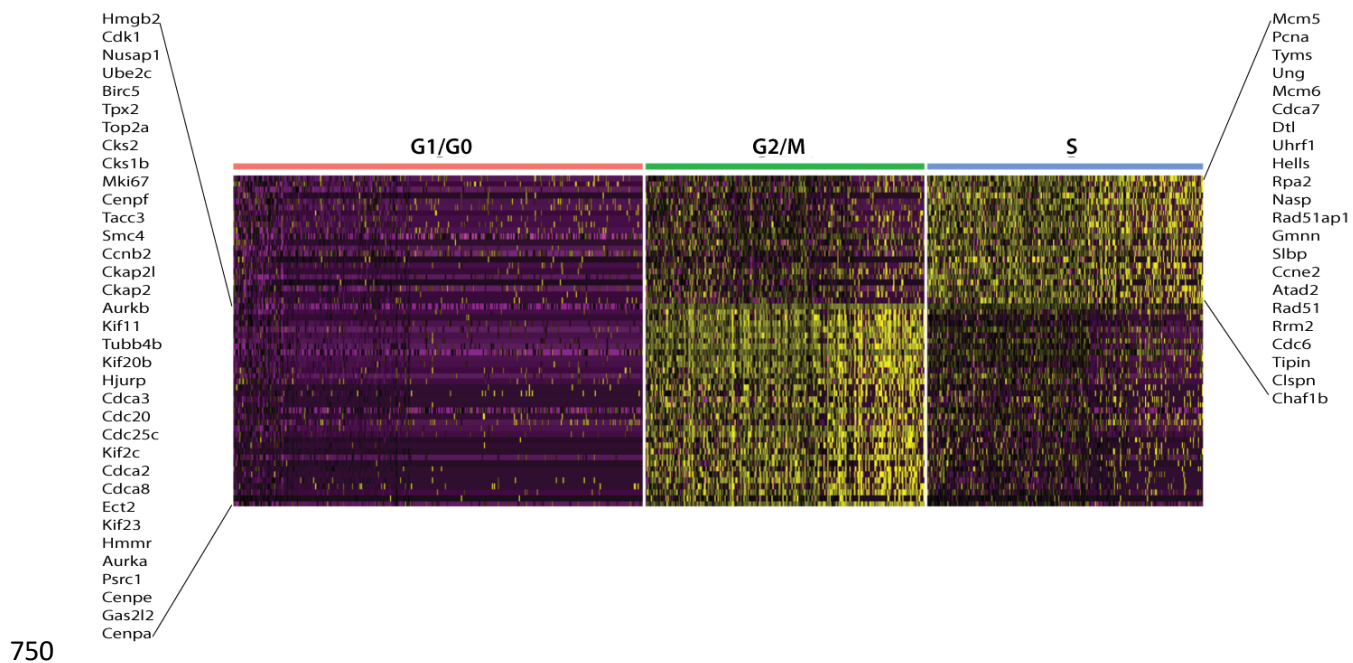

751 **Table S1. Top marker genes for major NC-derived cell types.**

752 **Table S2. Top marker genes for NC-derived mesenchymal clusters.**

753 "p\_val" and "p\_val\_adj" represent the probability for a gene to mark the cluster. avg\_logFC, log2  
754 of the ratio of the average expression level of a gene for all cells within the cluster compare to  
755 all the other cells. "pct.1" and "pct.2" are the percent of cells in or out the cluster that express  
756 the gene.

757 **Table S3. Top gene lists in groups 1 and 2 that exhibit temporal expression patterns,**  
758 **related to figure 5.**

759 **Table S4. Top gene lists in groups 1~4 from BEAM Analysis of Branch Point 1, related to**  
760 **figure 6.**

761 **Table S5. Top marker genes for E11.5 facial mesenchymal clusters m0~m3.**

762 **Table S6. Differentially expressed genes between m0, m2.**

763 **Table S7. Differentially expressed genes between m1, m2.**

764 Highly expressed genes (avg\_logFC > 0.2, P adj < 0.05) in m0, m1, or m2 are shown. The  
765 percentage of cells that have detected level of gene expression in each cluster (pct.1 and pct.2)  
766 are shown.

767

| <b>Table S1</b> | p_val | avg_logFC   | pct.1 | pct.2 | p_val_adj | cluster         |
|-----------------|-------|-------------|-------|-------|-----------|-----------------|
| Twist1          | 0     | 1.837950537 | 0.923 | 0.433 | 0         | Mesenchymal     |
| Prrx1           | 0     | 1.718982678 | 0.895 | 0.452 | 0         | Mesenchymal     |
| Gpc3            | 0     | 1.443583933 | 0.945 | 0.456 | 0         | Mesenchymal     |
| Lgals1          | 0     | 1.336392147 | 0.986 | 0.599 | 0         | Mesenchymal     |
| Col3a1          | 0     | 1.297483355 | 0.936 | 0.521 | 0         | Mesenchymal     |
| Col1a2          | 0     | 1.196412671 | 0.962 | 0.531 | 0         | Mesenchymal     |
| Barx1           | 0     | 1.153533664 | 0.662 | 0.323 | 0         | Mesenchymal     |
| Prrx2           | 0     | 1.142081491 | 0.852 | 0.29  | 0         | Mesenchymal     |
| Ptn             | 0     | 1.123755488 | 0.954 | 0.651 | 0         | Mesenchymal     |
| Mdk             | 0     | 1.087947385 | 1     | 0.825 | 0         | Mesenchymal     |
| H19             | 0     | 1.036826715 | 0.895 | 0.533 | 0         | Mesenchymal     |
| Tpm1            | 0     | 1.035623992 | 0.934 | 0.643 | 0         | Mesenchymal     |
| Igfbp4          | 0     | 1.006166922 | 0.956 | 0.632 | 0         | Mesenchymal     |
| Msx1            | 0     | 0.973900235 | 0.741 | 0.393 | 0         | Mesenchymal     |
| Lpar1           | 0     | 0.94218044  | 0.871 | 0.443 | 0         | Mesenchymal     |
| Cdh11           | 0     | 0.941894922 | 0.886 | 0.516 | 0         | Mesenchymal     |
| Gas1            | 0     | 0.931569071 | 0.886 | 0.525 | 0         | Mesenchymal     |
| Peg3            | 0     | 0.873679186 | 0.87  | 0.645 | 0         | Mesenchymal     |
| Alx1            | 0     | 0.869351114 | 0.651 | 0.292 | 0         | Mesenchymal     |
| Fabp7           | 0     | 1.786473609 | 0.962 | 0.357 | 0         | Early Migration |
| Ednrb           | 0     | 1.529837076 | 0.962 | 0.346 | 0         | Early Migration |
| Dbi             | 0     | 1.309816675 | 0.998 | 0.897 | 0         | Early Migration |
| Plp1            | 0     | 1.309460685 | 0.95  | 0.337 | 0         | Early Migration |
| Sox10           | 0     | 1.067943647 | 0.949 | 0.24  | 0         | Early Migration |
| Lmo4            | 0     | 1.051364362 | 0.969 | 0.745 | 0         | Early Migration |
| Pls3            | 0     | 1.045389778 | 0.914 | 0.383 | 0         | Early Migration |
| Vim             | 0     | 1.042342624 | 0.998 | 0.885 | 0         | Early Migration |
| Phactr1         | 0     | 1.007878875 | 0.903 | 0.409 | 0         | Early Migration |
| Cdh6            | 0     | 0.96435694  | 0.871 | 0.39  | 0         | Early Migration |
| Postn           | 0     | 0.941535298 | 0.945 | 0.478 | 0         | Early Migration |
| Erbp3           | 0     | 0.897573765 | 0.913 | 0.217 | 0         | Early Migration |
| Foxd3           | 0     | 0.89232875  | 0.893 | 0.213 | 0         | Early Migration |
| Sparc           | 0     | 0.882325379 | 0.976 | 0.686 | 0         | Early Migration |
| Rhob            | 0     | 0.848181188 | 0.941 | 0.537 | 0         | Early Migration |
| Rgcc            | 0     | 0.847376283 | 0.796 | 0.398 | 0         | Early Migration |
| Metrn           | 0     | 0.843090468 | 0.954 | 0.459 | 0         | Early Migration |
| Dnajc1          | 0     | 0.820848538 | 0.959 | 0.497 | 0         | Early Migration |
| Tubb3           | 0     | 3.196231028 | 0.997 | 0.722 | 0         | Neural          |
| Stmn2           | 0     | 2.744425076 | 0.941 | 0.652 | 0         | Neural          |
| Rtn1            | 0     | 2.661743025 | 0.97  | 0.556 | 0         | Neural          |
| Igfbp1          | 0     | 2.456986185 | 0.858 | 0.548 | 0         | Neural          |
| Tubb2b          | 0     | 2.280173965 | 1     | 0.912 | 0         | Neural          |

|               |           |             |       |       |           |              |
|---------------|-----------|-------------|-------|-------|-----------|--------------|
| Ina           | 0         | 2.223342976 | 0.838 | 0.529 | 0         | Neural       |
| Map1b         | 0         | 2.223260464 | 0.996 | 0.823 | 0         | Neural       |
| Stmn3         | 0         | 2.136427725 | 0.913 | 0.567 | 0         | Neural       |
| Elavl3        | 0         | 2.117870037 | 0.983 | 0.618 | 0         | Neural       |
| Tagln3        | 0         | 2.025686207 | 0.976 | 0.547 | 0         | Neural       |
| Tuba1a        | 0         | 1.887266269 | 1     | 0.993 | 0         | Neural       |
| Ckb           | 0         | 1.84327919  | 0.982 | 0.722 | 0         | Neural       |
| Nefm          | 0         | 1.838292157 | 0.763 | 0.605 | 0         | Neural       |
| Ebf1          | 0         | 1.813158281 | 0.904 | 0.679 | 0         | Neural       |
| Elavl4        | 0         | 1.79265133  | 0.941 | 0.504 | 0         | Neural       |
| Mllt11        | 0         | 1.757808348 | 0.948 | 0.554 | 0         | Neural       |
| Crmp1         | 0         | 1.749022743 | 0.943 | 0.54  | 0         | Neural       |
| Nhlh2         | 0         | 1.721136315 | 0.813 | 0.501 | 0         | Neural       |
| Nefl          | 0         | 1.704633963 | 0.728 | 0.609 | 0         | Neural       |
| Dcx           | 0         | 1.701401224 | 0.935 | 0.622 | 0         | Neural       |
| Clic6         | 0         | 0.651215592 | 0.967 | 0.067 | 0         | Pre-EMT      |
| Pifo          | 0         | 0.553802765 | 0.967 | 0.058 | 0         | Pre-EMT      |
| C1qtnf3       | 0         | 0.540598443 | 0.907 | 0.112 | 0         | Pre-EMT      |
| Deup1         | 0         | 0.520932528 | 0.929 | 0.063 | 0         | Pre-EMT      |
| 1500015O10Rik | 0         | 0.508643191 | 0.956 | 0.175 | 0         | Pre-EMT      |
| Gmnc          | 0         | 0.428575115 | 0.888 | 0.04  | 0         | Pre-EMT      |
| Crb3          | 0         | 0.343304214 | 0.907 | 0.085 | 0         | Pre-EMT      |
| 1700012B09Rik | 0         | 0.319688479 | 0.891 | 0.11  | 0         | Pre-EMT      |
| Ccdc113       | 0         | 0.272468863 | 0.951 | 0.105 | 0         | Pre-EMT      |
| Cfap206       | 0         | 0.262485757 | 0.945 | 0.099 | 0         | Pre-EMT      |
| Dnajb13       | 4.66E-302 | 0.270954702 | 0.921 | 0.247 | 9.31E-299 | Pre-EMT      |
| 1700016K19Rik | 2.20E-263 | 0.275156039 | 0.926 | 0.145 | 4.40E-260 | Pre-EMT      |
| Rbm47         | 8.01E-254 | 0.480341361 | 0.921 | 0.153 | 1.60E-250 | Pre-EMT      |
| Ccno          | 2.13E-246 | 0.489108294 | 0.915 | 0.234 | 4.26E-243 | Pre-EMT      |
| Foxj1         | 9.16E-242 | 0.858098323 | 0.956 | 0.15  | 1.83E-238 | Pre-EMT      |
| Sfn           | 8.79E-241 | 0.620060877 | 0.921 | 0.177 | 1.76E-237 | Pre-EMT      |
| Ezr           | 1.03E-238 | 2.273323909 | 0.995 | 0.462 | 2.06E-235 | Pre-EMT      |
| AC154683.1    | 7.23E-233 | 0.876625528 | 0.945 | 0.23  | 1.45E-229 | Pre-EMT      |
| Pthlh         | 2.31E-224 | 0.342670286 | 0.948 | 0.379 | 4.61E-221 | Pre-EMT      |
| Gata4         | 1.24E-131 | 0.395465864 | 0.648 | 0.064 | 2.47E-128 | Cardiac(OFT) |

|          |          |             |       |       |          |              |
|----------|----------|-------------|-------|-------|----------|--------------|
| Gata6    | 1.16E-92 | 1.082319789 | 0.841 | 0.159 | 2.32E-89 | Cardiac(OFT) |
| Tbx20    | 1.33E-83 | 0.815028396 | 0.731 | 0.128 | 2.65E-80 | Cardiac(OFT) |
| H191     | 3.17E-81 | 1.688768303 | 1     | 0.713 | 6.34E-78 | Cardiac(OFT) |
| Tagln    | 1.30E-80 | 2.643572077 | 0.903 | 0.369 | 2.61E-77 | Cardiac(OFT) |
| Acta2    | 2.52E-79 | 2.687111999 | 0.869 | 0.344 | 5.03E-76 | Cardiac(OFT) |
| Sparc2   | 2.92E-76 | 1.420431613 | 1     | 0.728 | 5.84E-73 | Cardiac(OFT) |
| S100a111 | 2.81E-75 | 1.381788161 | 0.972 | 0.601 | 5.62E-72 | Cardiac(OFT) |
| Myl12a1  | 9.91E-75 | 0.987316952 | 1     | 0.817 | 1.98E-71 | Cardiac(OFT) |
| Myl91    | 5.22E-73 | 1.754909249 | 0.938 | 0.583 | 1.04E-69 | Cardiac(OFT) |
| Tpm11    | 1.40E-72 | 1.585025889 | 0.986 | 0.788 | 2.79E-69 | Cardiac(OFT) |
| Fstl12   | 1.76E-71 | 1.232137331 | 0.993 | 0.713 | 3.51E-68 | Cardiac(OFT) |
| Col1a11  | 2.19E-71 | 1.419467781 | 0.966 | 0.638 | 4.37E-68 | Cardiac(OFT) |
| Anxa51   | 3.38E-70 | 1.361708054 | 0.959 | 0.602 | 6.76E-67 | Cardiac(OFT) |
| Rhoc3    | 1.01E-69 | 1.11376957  | 0.972 | 0.602 | 2.02E-66 | Cardiac(OFT) |
| Fn11     | 1.00E-68 | 1.189440549 | 0.979 | 0.662 | 2.01E-65 | Cardiac(OFT) |
| Tpm21    | 2.16E-68 | 1.262410417 | 0.945 | 0.561 | 4.32E-65 | Cardiac(OFT) |
| Lgals11  | 7.34E-64 | 1.331547992 | 0.993 | 0.792 | 1.47E-60 | Cardiac(OFT) |
| Col3a11  | 1.74E-63 | 1.404975276 | 0.979 | 0.728 | 3.48E-60 | Cardiac(OFT) |

768



| <b>Table S2</b> | p_val     | avg_logFC | pct.1 | pct.2 | p_val_adj | cluster |
|-----------------|-----------|-----------|-------|-------|-----------|---------|
| Pou3f3          | 4.23E-303 | 0.467173  | 0.864 | 0.562 | 8.46E-300 | 0       |
| Pantr1          | 1.05E-298 | 0.592121  | 0.898 | 0.602 | 2.10E-295 | 0       |
| Pcp4            | 1.35E-298 | 0.263894  | 0.725 | 0.29  | 2.69E-295 | 0       |
| Meis1           | 1.17E-182 | 0.357107  | 0.866 | 0.559 | 2.35E-179 | 0       |
| Meis2           | 1.38E-166 | 0.457654  | 0.949 | 0.701 | 2.77E-163 | 0       |
| Foxl2           | 9.55E-266 | 0.620202  | 0.769 | 0.511 | 1.91E-262 | 1       |
| Alx1            | 7.92E-257 | 0.863108  | 0.885 | 0.615 | 1.58E-253 | 1       |
| Igf1            | 1.58E-208 | 0.595412  | 0.867 | 0.679 | 3.16E-205 | 1       |
| Irx3            | 2.05E-189 | 0.581111  | 0.848 | 0.614 | 4.11E-186 | 1       |
| Irx5            | 4.74E-134 | 0.483192  | 0.822 | 0.633 | 9.47E-131 | 1       |
| Lhx8            | 0         | 1.087502  | 0.965 | 0.549 | 0         | 2       |
| Lhx6            | 5.24E-284 | 0.492885  | 0.85  | 0.519 | 1.05E-280 | 2       |
| Pcdh10          | 8.80E-228 | 0.613855  | 0.863 | 0.579 | 1.76E-224 | 2       |
| Prrx1           | 3.99E-226 | 0.687277  | 1     | 0.883 | 7.98E-223 | 2       |
| Tfap2c          | 3.83E-222 | 0.314842  | 0.793 | 0.456 | 7.65E-219 | 2       |
| Sox9            | 1.59E-195 | 0.879273  | 0.902 | 0.633 | 3.19E-192 | 3       |
| Foxc1           | 3.29E-157 | 0.607397  | 0.769 | 0.418 | 6.57E-154 | 3       |
| Crym1           | 1.93E-141 | 0.85107   | 0.748 | 0.469 | 3.86E-138 | 3       |
| Col2a1          | 5.42E-140 | 0.704274  | 0.872 | 0.684 | 1.08E-136 | 3       |
| Six2            | 4.63E-128 | 0.633662  | 0.87  | 0.721 | 9.26E-125 | 3       |
| Sfrp2           | 6.00E-142 | 1.477298  | 0.802 | 0.734 | 1.20E-138 | 4       |
| Tsc22d1         | 6.40E-87  | 0.495903  | 0.949 | 0.949 | 1.28E-83  | 4       |
| Col2a11         | 1.23E-86  | 1.02935   | 0.761 | 0.695 | 2.46E-83  | 4       |
| Barx11          | 4.65E-67  | 1.342572  | 0.686 | 0.659 | 9.30E-64  | 4       |
| Mecom           | 9.73E-61  | 0.656984  | 0.642 | 0.581 | 1.95E-57  | 4       |
| Dlx5            | 4.89E-264 | 0.821311  | 0.949 | 0.614 | 9.77E-261 | 5       |
| Dlx6os11        | 8.95E-203 | 0.473625  | 0.846 | 0.51  | 1.79E-199 | 5       |
| Dlx6            | 8.45E-178 | 0.556757  | 0.862 | 0.529 | 1.69E-174 | 5       |
| Tac1            | 2.10E-148 | 0.381195  | 0.821 | 0.532 | 4.20E-145 | 5       |
| Ccnd1           | 5.29E-148 | 0.511618  | 0.988 | 0.814 | 1.06E-144 | 5       |
| Hand2           | 1.12E-190 | 0.829173  | 0.85  | 0.51  | 2.23E-187 | 6       |
| Pitx11          | 2.63E-129 | 0.775259  | 0.833 | 0.587 | 5.27E-126 | 6       |
| 5033428I22Rik   | 1.81E-110 | 0.344276  | 0.711 | 0.47  | 3.61E-107 | 6       |
| Satb2           | 9.24E-106 | 0.266098  | 0.728 | 0.483 | 1.85E-102 | 6       |
| DLK1            | 1.25E-87  | 0.783428  | 0.862 | 0.69  | 2.50E-84  | 6       |
| Wnt5a           | 1.73E-212 | 0.909328  | 0.951 | 0.722 | 3.47E-209 | 7       |
| Alx12           | 1.80E-195 | 0.991865  | 0.952 | 0.627 | 3.59E-192 | 7       |
| Crabp1          | 6.15E-172 | 0.992566  | 0.984 | 0.869 | 1.23E-168 | 7       |
| Sox11           | 1.59E-141 | 0.565017  | 1     | 0.979 | 3.17E-138 | 7       |
| Pax7            | 1.76E-136 | 0.604201  | 0.746 | 0.485 | 3.53E-133 | 7       |
| Meox2           | 4.60E-108 | 0.472637  | 0.747 | 0.427 | 9.20E-105 | 8       |
| Igf3            | 2.59E-84  | 0.761039  | 0.717 | 0.438 | 5.18E-81  | 8       |

|                |           |          |       |       |           |    |
|----------------|-----------|----------|-------|-------|-----------|----|
| Efemp1         | 4.46E-84  | 0.433892 | 0.77  | 0.552 | 8.91E-81  | 8  |
| Igfbp5         | 1.67E-77  | 0.768754 | 0.858 | 0.677 | 3.34E-74  | 8  |
| Tcf15          | 1.10E-76  | 0.264764 | 0.671 | 0.369 | 2.21E-73  | 8  |
| Meg32          | 2.88E-147 | 1.40046  | 0.986 | 0.927 | 5.75E-144 | 9  |
| H193           | 1.73E-122 | 0.878608 | 0.974 | 0.893 | 3.47E-119 | 9  |
| Dlk12          | 1.09E-108 | 1.343368 | 0.874 | 0.693 | 2.18E-105 | 9  |
| Cdkn1c1        | 2.83E-90  | 1.054203 | 0.996 | 0.982 | 5.66E-87  | 9  |
| Lpar1          | 5.67E-66  | 0.518055 | 0.907 | 0.866 | 1.13E-62  | 9  |
| Lef11          | 1.33E-224 | 1.567127 | 0.953 | 0.679 | 2.65E-221 | 10 |
| Twist1         | 1.72E-181 | 0.897208 | 1     | 0.918 | 3.43E-178 | 10 |
| Cxcl141        | 1.78E-177 | 1.949817 | 0.9   | 0.641 | 3.55E-174 | 10 |
| Trps11         | 3.55E-144 | 1.288034 | 0.878 | 0.704 | 7.11E-141 | 10 |
| Zeb21          | 5.57E-130 | 1.07641  | 0.866 | 0.685 | 1.11E-126 | 10 |
| Akap12         | 4.30E-192 | 1.604027 | 0.917 | 0.512 | 8.60E-189 | 11 |
| Alcam          | 3.15E-190 | 1.840846 | 0.926 | 0.67  | 6.31E-187 | 11 |
| Col1a11        | 3.33E-184 | 1.36234  | 0.986 | 0.801 | 6.67E-181 | 11 |
| Sparc1         | 2.29E-168 | 1.178145 | 0.99  | 0.878 | 4.58E-165 | 11 |
| Vim1           | 8.58E-168 | 0.987026 | 0.998 | 0.935 | 1.72E-164 | 11 |
| Plagl11        | 3.47E-194 | 1.375955 | 0.976 | 0.638 | 6.93E-191 | 12 |
| Peg34          | 1.78E-184 | 1.325317 | 0.997 | 0.867 | 3.57E-181 | 12 |
| Dlk13          | 4.35E-177 | 1.504826 | 0.992 | 0.691 | 8.70E-174 | 12 |
| Hand22         | 6.17E-176 | 1.163096 | 0.951 | 0.518 | 1.23E-172 | 12 |
| Itm2a4         | 1.93E-171 | 1.325358 | 0.989 | 0.748 | 3.85E-168 | 12 |
| Tmsb4x2        | 5.50E-87  | 1.689991 | 1     | 0.985 | 1.10E-83  | 13 |
| Sparc2         | 3.82E-80  | 1.310559 | 1     | 0.881 | 7.64E-77  | 13 |
| Gata6          | 8.63E-77  | 1.038987 | 0.794 | 0.206 | 1.73E-73  | 13 |
| Anxa51         | 4.21E-72  | 1.373198 | 0.942 | 0.684 | 8.42E-69  | 13 |
| MyI92          | 1.62E-71  | 1.630096 | 0.942 | 0.729 | 3.23E-68  | 13 |
| Alx13          | 3.09E-28  | 1.467363 | 0.949 | 0.644 | 6.19E-25  | 14 |
| Kcnmb2         | 6.15E-28  | 1.093351 | 0.808 | 0.457 | 1.23E-24  | 14 |
| Plk23          | 4.04E-24  | 1.045568 | 0.923 | 0.712 | 8.08E-21  | 14 |
| 2010111I01Rik2 | 4.33E-21  | 0.915288 | 0.949 | 0.677 | 8.65E-18  | 14 |
| Foxd14         | 1.69E-19  | 0.810664 | 0.91  | 0.612 | 3.37E-16  | 14 |

769

| <b>Table S3</b> |   | Group |         | Group |
|-----------------|---|-------|---------|-------|
| Col9a1          | 1 |       | Col2a1  | 2     |
| Mapk14          | 1 |       | Sox5    | 2     |
| Zbtb16          | 1 |       | Sox6    | 2     |
| Srf             | 1 |       | Rarg    | 2     |
| Poc1a           | 1 |       | Col11a1 | 2     |
| Carm1           | 1 |       | Pthlh   | 2     |
| Zmpste24        | 1 |       | Runx2   | 2     |
| Kat2a           | 1 |       | Gdf5    | 2     |
| Mapk3           | 1 |       | Bmp4    | 2     |
| Dlx2            | 1 |       | Rara    | 2     |
| Snai1           | 1 |       | Msx2    | 2     |
| Matn3           | 1 |       | Scx     | 2     |
| Mycn            | 1 |       | Bmp2    | 2     |
| Twist1          | 1 |       | Shox2   | 2     |
| Cdx1            | 1 |       | Rflna   | 2     |
| Trp53           | 1 |       | Rarb    | 2     |
| Rhoa            | 1 |       | Tgfbr2  | 2     |
| Mcp1            | 1 |       | Rflnb   | 2     |
| Notch2          | 1 |       | Wnt5a   | 2     |
| Sbds            | 1 |       | Wnt9a   | 2     |
| Cited2          | 1 |       | Trps1   | 2     |
| Foxc1           | 1 |       | Col11a2 | 2     |
| Sp5             | 1 |       | Thbs3   | 2     |
| Insig1          | 1 |       | Trip11  | 2     |
| Nsd2            | 1 |       | Lrp6    | 2     |
| Tulp3           | 1 |       | Thbs1   | 2     |
| Rpl13           | 1 |       | Msx1    | 2     |
| Fli1            | 1 |       | Hspg2   | 2     |
| Cadm1           | 1 |       | Mef2c   | 2     |
| Ppib            | 1 |       | Axin2   | 2     |
| Prpsap2         | 1 |       | Sulf2   | 2     |
| Tfap2a          | 1 |       | Sulf1   | 2     |
| Bbx             | 1 |       | Ift80   | 2     |
| Tjp2            | 1 |       | Por     | 2     |
| Fzd4            | 1 |       | Chsy1   | 2     |
| Csnk1d          | 1 |       | Smad1   | 2     |
| Rspo1           | 1 |       | Fgf18   | 2     |
| Dixdc1          | 1 |       | Bmp6    | 2     |
| Stk11           | 1 |       | Fgf9    | 2     |
| Tcf7            | 1 |       | Tgfb1   | 2     |
| Ccdc88c         | 1 |       | Nog     | 2     |
| Myc             | 1 |       | Snai2   | 2     |

|          |   |         |   |
|----------|---|---------|---|
| Sox2     | 1 | Tgfb2   | 2 |
| Gid8     | 1 | Runx3   | 2 |
| Emd      | 1 | Gli2    | 2 |
| Ctnnbip1 | 1 | Prrx1   | 2 |
| Cby1     | 1 | Ddrgk1  | 2 |
| Cdc73    | 1 | Otor    | 2 |
| Csnk2a1  | 1 | Uncx    | 2 |
| Pin1     | 1 | Creb3l2 | 2 |
| Ddx3x    | 1 | Chst11  | 2 |
| Hdac1    | 1 | Bmpr1a  | 2 |
| Rac1     | 1 | Bmp1    | 2 |
| Peg12    | 1 | Snx19   | 2 |
| Csnk1g2  | 1 | Pth1r   | 2 |
| Nxn      | 1 | Six2    | 2 |
| Depdc1b  | 1 | Fgfr3   | 2 |
| Ppm1a    | 1 | Gli3    | 2 |
| Otulin   | 1 | Gnas    | 2 |
| Sdhaf2   | 1 | Ext1    | 2 |
| Ccne1    | 1 | Col1a1  | 2 |
| Aspm     | 1 | Stc1    | 2 |
| Csnk2a2  | 1 | Sik3    | 2 |
| Pten     | 1 | Ltbp3   | 2 |
| Hmga2    | 1 | Grem1   | 2 |
| Ube2b    | 1 | Ep300   | 2 |
| Ruvbl1   | 1 | Smad9   | 2 |
| Nle1     | 1 | Mef2d   | 2 |
| Rnf220   | 1 | Col27a1 | 2 |
| Etv2     | 1 | Scube2  | 2 |
| Ruvbl2   | 1 | Glg1    | 2 |
| Mesd     | 1 | Anxa6   | 2 |
| Snx3     | 1 | Smad5   | 2 |
| Vps35    | 1 | Osr2    | 2 |
| Fermt2   | 1 | Ctnnb1  | 2 |
| Gpc5     | 1 | Ror2    | 2 |
| Wdr61    | 1 | Rspo2   | 2 |
| Lrrfip2  | 1 | Pkd1    | 2 |
| G3bp1    | 1 | Smad3   | 2 |
| Ctdnep1  | 1 | Fgf2    | 2 |
| Grk6     | 1 | Thra    | 2 |
| Sdc1     | 1 | Fbxw4   | 2 |
| Cela1    | 1 | Dicer1  | 2 |
| Arl6     | 1 | Bmp7    | 2 |
| Csnk2b   | 1 | Fgfr1   | 2 |

|        |   |        |   |
|--------|---|--------|---|
| Rnf138 | 1 | Prkca  | 2 |
| Mbd2   | 1 | Satb2  | 2 |
| Plk1   | 1 | Bmpr2  | 2 |
| Cenpe  | 1 | Mia3   | 2 |
| Aurka  | 1 | Lnpk   | 2 |
| Cdca5  | 1 | Atp7a  | 2 |
| Mad2l1 | 1 | Ctsk   | 2 |
| Fbxo5  | 1 | Gdf6   | 2 |
| Sgo2a  | 1 | Tgfbr1 | 2 |
| Cdt1   | 1 | Nfib   | 2 |

770

| <b>Table S4</b> | Group |
|-----------------|-------|
| Crabp1          | 1     |
| Crabp2          | 1     |
| AC160336.1      | 1     |
| Prtg            | 1     |
| Ldha            | 1     |
| Grrp1           | 1     |
| Srm             | 1     |
| Lin28a          | 1     |
| Dctpp1          | 1     |
| Aldoa           | 1     |
| Rgcc            | 2     |
| Fabp7           | 2     |
| Ttyh1           | 2     |
| Car11           | 2     |
| Nell2           | 2     |
| Postn           | 2     |
| Gpm6b           | 2     |
| Sparc           | 2     |
| Zbtb20          | 2     |
| Hey2            | 2     |
| Map1b           | 3     |
| Hist3h2ba       | 3     |
| Apoe            | 3     |
| Nfia            | 3     |
| Anxa2           | 3     |
| Ckb             | 3     |
| Rspo1           | 3     |
| Scrn1           | 3     |
| Crip1           | 3     |
| Arl4a           | 3     |
| Twist1          | 4     |
| Gsta4           | 4     |
| Meis2           | 4     |
| Cd24a           | 4     |
| Prrx2           | 4     |
| Slc16a3         | 4     |
| Sfrp2           | 4     |
| Mest            | 4     |
| Cited2          | 4     |
| Aprt            | 4     |
| Aard            | 4     |
| Id1             | 4     |

|       |   |
|-------|---|
| Cth   | 4 |
| Ptgis | 4 |
| Hacd1 | 4 |
| Naf1  | 4 |

771

772

| Table S5 | p_val     | avg_logFC | pct.1 | pct.2 | p_val_adj | cluster |
|----------|-----------|-----------|-------|-------|-----------|---------|
| Col2a1   | 3.77E-99  | 1.181788  | 0.856 | 0.467 | 7.53E-96  | m0      |
| Sfrp1    | 7.82E-89  | 0.915514  | 0.861 | 0.519 | 1.56E-85  | m0      |
| Foxc1    | 1.13E-79  | 0.86289   | 0.757 | 0.355 | 2.26E-76  | m0      |
| S100a11  | 5.87E-59  | 0.635084  | 0.96  | 0.867 | 1.17E-55  | m0      |
| Sox9     | 2.12E-58  | 0.997222  | 0.761 | 0.503 | 4.23E-55  | m0      |
| Ebf1     | 6.53E-55  | 0.884611  | 0.82  | 0.584 | 1.31E-51  | m0      |
| Pkdcc    | 1.20E-54  | 0.779568  | 0.825 | 0.58  | 2.41E-51  | m0      |
| Six2     | 1.97E-51  | 0.637623  | 0.789 | 0.514 | 3.95E-48  | m0      |
| Zic2     | 5.40E-51  | 0.319418  | 0.427 | 0.066 | 1.08E-47  | m0      |
| Calca    | 9.57E-47  | 0.732756  | 0.579 | 0.307 | 1.91E-43  | m0      |
| Alx1     | 1.34E-46  | 0.783765  | 0.908 | 0.64  | 2.68E-43  | m1      |
| Mdk      | 2.32E-39  | 0.323551  | 1     | 1     | 4.64E-36  | m1      |
| Mfap4    | 9.50E-25  | 0.386263  | 0.966 | 0.935 | 1.90E-21  | m1      |
| Id3      | 1.31E-22  | 0.421061  | 0.974 | 0.891 | 2.63E-19  | m1      |
| Gata3    | 3.28E-22  | 0.444604  | 0.479 | 0.255 | 6.56E-19  | m1      |
| Tbx2     | 6.13E-22  | 0.407679  | 0.65  | 0.429 | 1.23E-18  | m1      |
| Creb5    | 7.38E-21  | 0.476501  | 0.607 | 0.424 | 1.48E-17  | m1      |
| Mpped2   | 2.76E-19  | 0.462925  | 0.774 | 0.6   | 5.53E-16  | m1      |
| Wnt5a    | 2.52E-17  | 0.423862  | 0.762 | 0.62  | 5.03E-14  | m1      |
| Gata2    | 5.39E-17  | 0.366436  | 0.521 | 0.328 | 1.08E-13  | m1      |
| Stmn1    | 5.06E-68  | 0.538458  | 1     | 0.991 | 1.01E-64  | m2      |
| Fabp5    | 2.44E-61  | 0.62328   | 1     | 0.9   | 4.89E-58  | m2      |
| Lix1     | 3.86E-59  | 0.757052  | 0.804 | 0.369 | 7.72E-56  | m2      |
| Crabp1   | 3.07E-56  | 0.871867  | 0.943 | 0.687 | 6.14E-53  | m2      |
| Twist1   | 1.17E-54  | 0.780003  | 0.973 | 0.836 | 2.33E-51  | m2      |
| Lef1     | 2.80E-51  | 0.771265  | 0.714 | 0.394 | 5.61E-48  | m2      |
| Pax1     | 1.19E-50  | 0.6487    | 0.571 | 0.213 | 2.38E-47  | m2      |
| Stmn2    | 7.13E-49  | 0.78273   | 0.557 | 0.204 | 1.43E-45  | m2      |
| Rrm2     | 3.71E-44  | 0.756943  | 0.744 | 0.433 | 7.41E-41  | m2      |
| Al646519 | 7.29E-40  | 0.322885  | 0.473 | 0.13  | 1.46E-36  | m2      |
| Dlk1     | 1.80E-126 | 2.165033  | 0.954 | 0.587 | 3.59E-123 | m3      |
| Cdkn1c   | 8.01E-112 | 1.569123  | 1     | 0.989 | 1.60E-108 | m3      |
| Plagl1   | 6.13E-110 | 1.265317  | 0.937 | 0.531 | 1.23E-106 | m3      |
| Mest     | 4.34E-108 | 1.079631  | 0.997 | 0.761 | 8.67E-105 | m3      |
| Hand2    | 1.18E-101 | 1.087069  | 0.776 | 0.232 | 2.36E-98  | m3      |
| H19      | 2.63E-95  | 1.118661  | 0.987 | 0.847 | 5.26E-92  | m3      |
| Meg3     | 8.66E-89  | 1.192614  | 0.997 | 0.914 | 1.73E-85  | m3      |
| Peg3     | 4.64E-88  | 1.270328  | 0.967 | 0.789 | 9.27E-85  | m3      |
| Gpc3     | 4.45E-85  | 0.829088  | 0.997 | 0.83  | 8.90E-82  | m3      |
| Nrk      | 2.63E-70  | 0.903391  | 0.828 | 0.475 | 5.26E-67  | m3      |

773



| <b>Table S6</b> | p_val    | avg_logFC | pct.1 | pct.2 | p_val_adj |
|-----------------|----------|-----------|-------|-------|-----------|
| Sfrp1           | 1.28E-60 | 1.020448  | 0.859 | 0.507 | 2.57E-57  |
| Nr2f2           | 1.48E-54 | 0.98802   | 0.758 | 0.268 | 2.96E-51  |
| Col2a1          | 7.75E-53 | 1.075514  | 0.859 | 0.562 | 1.55E-49  |
| Foxc1           | 3.14E-49 | 0.870546  | 0.764 | 0.366 | 6.27E-46  |
| Pkdcc           | 5.71E-41 | 0.883909  | 0.826 | 0.559 | 1.14E-37  |
| Scx             | 1.83E-40 | 0.513053  | 0.697 | 0.34  | 3.66E-37  |
| Ebf1            | 3.87E-40 | 1.022873  | 0.824 | 0.582 | 7.74E-37  |
| Sox9            | 1.59E-39 | 1.052514  | 0.762 | 0.458 | 3.18E-36  |
| Foxp2           | 7.85E-39 | 0.856256  | 0.719 | 0.329 | 1.57E-35  |
| Islr            | 1.15E-38 | 0.669     | 0.752 | 0.464 | 2.31E-35  |
| Cxcl12          | 8.49E-35 | 0.990234  | 0.766 | 0.539 | 1.70E-31  |
| Sparc           | 3.39E-34 | 0.700054  | 0.966 | 0.885 | 6.77E-31  |
| Col9a1          | 5.47E-33 | 0.792423  | 0.687 | 0.363 | 1.09E-29  |
| H19             | 8.17E-32 | 0.656543  | 0.943 | 0.79  | 1.63E-28  |
| S100a11         | 5.53E-31 | 0.555594  | 0.964 | 0.896 | 1.11E-27  |
| Foxp1           | 1.20E-30 | 0.637863  | 0.873 | 0.602 | 2.39E-27  |
| Crym            | 4.23E-30 | 1.026478  | 0.683 | 0.346 | 8.45E-27  |
| Cdkn1c          | 1.88E-27 | 0.580529  | 0.992 | 0.983 | 3.76E-24  |
| Thbs1           | 6.30E-27 | 0.652725  | 0.644 | 0.38  | 1.26E-23  |
| Col9a2          | 3.22E-25 | 0.533942  | 0.65  | 0.389 | 6.43E-22  |
| Cldn11          | 6.08E-25 | 0.614006  | 0.582 | 0.305 | 1.22E-21  |
| Selenom         | 1.33E-24 | 0.504677  | 0.891 | 0.758 | 2.67E-21  |
| Tmsb4x          | 2.49E-24 | 0.601038  | 0.994 | 0.994 | 4.99E-21  |
| Tgfb2           | 2.03E-23 | 0.702159  | 0.75  | 0.553 | 4.05E-20  |
| Calca           | 3.95E-23 | 0.710456  | 0.588 | 0.363 | 7.90E-20  |
| Mest            | 1.51E-22 | 0.610764  | 0.855 | 0.715 | 3.03E-19  |
| Tgfb1           | 1.96E-22 | 0.553116  | 0.723 | 0.493 | 3.93E-19  |
| Nr2f1           | 2.33E-21 | 0.591666  | 0.754 | 0.524 | 4.65E-18  |
| Itm2a           | 5.66E-21 | 0.646689  | 0.812 | 0.7   | 1.13E-17  |
| Malat1          | 7.10E-21 | 0.535658  | 0.998 | 0.997 | 1.42E-17  |
| Igfbp5          | 7.49E-20 | 0.936769  | 0.703 | 0.55  | 1.50E-16  |
| Fbn2            | 3.76E-19 | 0.534481  | 0.913 | 0.853 | 7.52E-16  |
| Aebp1           | 6.07E-19 | 0.534053  | 0.598 | 0.357 | 1.21E-15  |
| Hist3h2ba       | 2.70E-18 | 0.590156  | 0.693 | 0.516 | 5.39E-15  |
| Foxd1           | 5.24E-18 | 0.734427  | 0.588 | 0.343 | 1.05E-14  |
| Maf             | 6.25E-18 | 0.575489  | 0.606 | 0.398 | 1.25E-14  |
| Apoe            | 1.41E-14 | 0.53326   | 0.723 | 0.605 | 2.82E-11  |
| Dkk2            | 1.66E-14 | 0.67385   | 0.576 | 0.349 | 3.31E-11  |
| Tsc22d1         | 2.08E-14 | 0.505721  | 0.921 | 0.882 | 4.15E-11  |
| Gm42418         | 6.01E-12 | 0.562094  | 1     | 1     | 1.20E-08  |
| Col4a1          | 1.03E-09 | 0.506056  | 0.723 | 0.646 | 2.06E-06  |
| Cthrc1          | 1.23E-07 | 0.543544  | 0.679 | 0.628 | 0.000247  |

|               |          |          |       |       |          |
|---------------|----------|----------|-------|-------|----------|
| Lix1          | 1.13E-69 | -1.0017  | 0.226 | 0.793 | 2.26E-66 |
| Stmn1         | 2.31E-69 | -0.66493 | 0.988 | 1     | 4.63E-66 |
| Twist1        | 1.63E-67 | -1.14838 | 0.78  | 0.971 | 3.27E-64 |
| Stmn2         | 3.81E-61 | -0.9131  | 0.095 | 0.556 | 7.61E-58 |
| Fabp5         | 1.15E-59 | -0.73428 | 0.877 | 1     | 2.30E-56 |
| Ptn           | 5.52E-58 | -1.32899 | 0.887 | 0.971 | 1.10E-54 |
| Crabp1        | 5.27E-54 | -1.05751 | 0.606 | 0.922 | 1.05E-50 |
| Sox11         | 1.28E-51 | -0.70656 | 0.875 | 0.991 | 2.56E-48 |
| Rrm2          | 2.80E-46 | -0.88112 | 0.376 | 0.758 | 5.61E-43 |
| Pax1          | 3.62E-45 | -0.64457 | 0.147 | 0.565 | 7.24E-42 |
| Nasp          | 6.43E-43 | -0.53667 | 0.915 | 0.971 | 1.29E-39 |
| Wnt5a         | 1.99E-42 | -0.85797 | 0.531 | 0.81  | 3.97E-39 |
| Id2           | 9.28E-40 | -0.78257 | 0.618 | 0.87  | 1.86E-36 |
| H2afz         | 1.85E-39 | -0.54631 | 0.99  | 1     | 3.69E-36 |
| Lef1          | 4.20E-36 | -0.81557 | 0.455 | 0.706 | 8.39E-33 |
| Pax3          | 9.03E-36 | -0.86303 | 0.483 | 0.718 | 1.81E-32 |
| Tyms          | 1.72E-35 | -0.57306 | 0.57  | 0.847 | 3.45E-32 |
| Zfhx3         | 2.78E-34 | -1.00285 | 0.671 | 0.865 | 5.56E-31 |
| Anxa2         | 1.55E-33 | -0.64857 | 0.721 | 0.922 | 3.09E-30 |
| Dnajc9        | 2.43E-33 | -0.54418 | 0.552 | 0.833 | 4.85E-30 |
| Gap43         | 1.47E-31 | -0.56717 | 0.37  | 0.695 | 2.95E-28 |
| Tnfaip6       | 3.66E-31 | -0.51224 | 0.388 | 0.72  | 7.33E-28 |
| Pclaf         | 1.74E-30 | -0.92385 | 0.537 | 0.767 | 3.48E-27 |
| Msx1          | 2.83E-30 | -0.93684 | 0.374 | 0.654 | 5.65E-27 |
| Prrx2         | 6.25E-30 | -0.57944 | 0.695 | 0.885 | 1.25E-26 |
| Alx1          | 4.53E-29 | -0.67345 | 0.626 | 0.859 | 9.05E-26 |
| Smc4          | 5.69E-28 | -0.53691 | 0.469 | 0.767 | 1.14E-24 |
| Hist1h1b      | 2.22E-26 | -0.99212 | 0.307 | 0.597 | 4.45E-23 |
| 2010111I01Rik | 3.81E-26 | -0.75023 | 0.497 | 0.715 | 7.62E-23 |
| Hist1h1e      | 3.66E-25 | -0.53061 | 0.315 | 0.611 | 7.31E-22 |
| Hist1h2ap     | 3.00E-23 | -1.1341  | 0.505 | 0.689 | 6.01E-20 |
| Hmgb2         | 4.87E-23 | -0.68815 | 0.85  | 0.916 | 9.74E-20 |
| Hist1h2ae     | 3.80E-22 | -0.83527 | 0.394 | 0.631 | 7.59E-19 |
| Zeb2          | 3.08E-20 | -0.63898 | 0.495 | 0.718 | 6.16E-17 |
| Crabp2        | 2.47E-19 | -0.50323 | 0.695 | 0.867 | 4.95E-16 |
| Top2a         | 9.68E-19 | -0.82848 | 0.515 | 0.68  | 1.94E-15 |
| Ifitm1        | 1.62E-18 | -0.50506 | 0.269 | 0.527 | 3.23E-15 |
| Mki67         | 3.28E-18 | -0.53571 | 0.473 | 0.677 | 6.57E-15 |
| Nbl1          | 5.49E-17 | -0.50253 | 0.558 | 0.735 | 1.10E-13 |
| Ube2c         | 1.54E-09 | -0.56163 | 0.471 | 0.605 | 3.09E-06 |

774

775

| <b>Table S7</b> | p_val    | avg_logFC | pct.1 | pct.2 | p_val_adj |
|-----------------|----------|-----------|-------|-------|-----------|
| Mfap4           | 4.07E-26 | 0.502695  | 0.967 | 0.922 | 8.14E-23  |
| Foxp2           | 2.86E-19 | 0.674452  | 0.612 | 0.329 | 5.73E-16  |
| Epha4           | 7.66E-16 | 0.508901  | 0.749 | 0.553 | 1.53E-12  |
| Hist3h2ba       | 9.11E-15 | 0.51013   | 0.678 | 0.516 | 1.82E-11  |
| Igfbp5          | 2.71E-14 | 0.806362  | 0.689 | 0.55  | 5.41E-11  |
| Creb5           | 1.19E-11 | 0.51449   | 0.592 | 0.444 | 2.39E-08  |
| Itm2a           | 4.71E-09 | 0.690702  | 0.785 | 0.7   | 9.43E-06  |
| Stmn1           | 2.92E-44 | -0.50051  | 0.992 | 1     | 5.85E-41  |
| Fabp5           | 5.01E-41 | -0.63687  | 0.876 | 1     | 1.00E-37  |
| Tyms            | 4.22E-40 | -0.70201  | 0.504 | 0.847 | 8.43E-37  |
| Pclaf           | 3.76E-39 | -1.22321  | 0.391 | 0.767 | 7.52E-36  |
| Hist1h1b        | 2.62E-38 | -1.22349  | 0.149 | 0.597 | 5.23E-35  |
| Rrm2            | 2.75E-38 | -0.87167  | 0.38  | 0.758 | 5.49E-35  |
| Dek             | 9.78E-35 | -0.61002  | 0.796 | 0.948 | 1.96E-31  |
| Hist1h2ap       | 2.10E-32 | -1.53365  | 0.38  | 0.689 | 4.20E-29  |
| Top2a           | 2.27E-32 | -1.15987  | 0.328 | 0.68  | 4.55E-29  |
| Crabp1          | 1.70E-29 | -0.73685  | 0.683 | 0.922 | 3.40E-26  |
| Hist1h1e        | 6.09E-29 | -0.63085  | 0.24  | 0.611 | 1.22E-25  |
| Hmgb2           | 9.85E-28 | -0.82583  | 0.807 | 0.916 | 1.97E-24  |
| Smc4            | 1.25E-27 | -0.62717  | 0.471 | 0.767 | 2.50E-24  |
| Clspn           | 1.47E-27 | -0.52086  | 0.229 | 0.576 | 2.94E-24  |
| Spc24           | 2.40E-27 | -0.60391  | 0.369 | 0.72  | 4.81E-24  |
| Gmnn            | 4.32E-27 | -0.57106  | 0.355 | 0.706 | 8.63E-24  |
| Rrm1            | 8.55E-27 | -0.51978  | 0.38  | 0.744 | 1.71E-23  |
| Lef1            | 3.13E-26 | -0.65071  | 0.397 | 0.706 | 6.25E-23  |
| Vim             | 1.12E-22 | -0.68345  | 0.879 | 0.974 | 2.25E-19  |
| Mki67           | 2.30E-22 | -0.66355  | 0.394 | 0.677 | 4.60E-19  |
| Smc2            | 9.85E-22 | -0.57038  | 0.46  | 0.738 | 1.97E-18  |
| Hist1h4d        | 6.97E-21 | -0.55714  | 0.242 | 0.548 | 1.39E-17  |
| Cdca8           | 7.20E-21 | -0.54295  | 0.339 | 0.657 | 1.44E-17  |
| Cdk1            | 1.12E-20 | -0.61241  | 0.391 | 0.654 | 2.24E-17  |
| Atad2           | 1.66E-19 | -0.57118  | 0.377 | 0.643 | 3.32E-16  |
| Ube2c           | 2.84E-19 | -0.68019  | 0.3   | 0.605 | 5.67E-16  |
| Tubb2b          | 8.30E-18 | -0.52476  | 0.656 | 0.888 | 1.66E-14  |
| Pax1            | 5.21E-16 | -0.58407  | 0.344 | 0.565 | 1.04E-12  |
| S100a6          | 9.09E-16 | -0.66506  | 0.402 | 0.646 | 1.82E-12  |
| Spc25           | 4.64E-15 | -0.51107  | 0.339 | 0.571 | 9.29E-12  |
| Hist1h2ae       | 8.66E-15 | -0.92622  | 0.46  | 0.631 | 1.73E-11  |
| Birc5           | 1.47E-14 | -0.5065   | 0.419 | 0.663 | 2.94E-11  |
| Stmn2           | 8.97E-12 | -0.51079  | 0.35  | 0.556 | 1.79E-08  |
| S100a10         | 1.91E-10 | -0.51272  | 0.667 | 0.844 | 3.82E-07  |
| Alcam           | 1.89E-08 | -0.54002  | 0.534 | 0.7   | 3.77E-05  |

|     |       |          |          |       |       |          |
|-----|-------|----------|----------|-------|-------|----------|
| 776 | Enpp2 | 3.51E-08 | -0.54154 | 0.295 | 0.484 | 7.02E-05 |
|-----|-------|----------|----------|-------|-------|----------|
